# Supplementary material for: Enantiodiscrimination by matrix-assisted DOSY NMR
Source: Royal Society of Chemistry journal article supplement (doi:10.1039/c9cc04268g), 2019-01-01
Supplement: c9cc04268g1.pdf [file c9cc04268g1.pdf]

# Enantiodiscrimination by Matrix-Assisted DOSY NMR

Kahlil Schwanka Salome<sup>a</sup> and Cláudio Francisco Tormena<sup>\*a</sup>

## Supplemental Information

### Table of contents

|                                                                                  |    |
|----------------------------------------------------------------------------------|----|
| Experimental details                                                             | 2  |
| Difference in diffusion values ( $\Delta D$ ) of the diastereoisomeric complexes | 3  |
| <sup>1</sup> H NMR spectra of menthol with ( <i>R</i> ) and ( <i>S</i> )-BINOL   | 4  |
| Example of calculation of $\Delta\delta$                                         | 5  |
| DOSY maps and Measured diffusion coefficients                                    | 6  |
| References                                                                       | 47 |

## Experimental details

Compounds **1-11** and **22** were obtained commercially and were used without further purification. The phenylethanol derivatives (compounds **12-21**) were obtained by reducing the carbonyl of the correspondent acetophenone using 1.2 mols of LiAlH<sub>4</sub> and 1 mol of acetophenone in THF, at 0 °C. The reactions were monitored by TLC and were quenched with water when all the reagent was consumed. The crude product was extracted, dried and no further purification was necessary.

NMR compounds were prepared using 8.0 μmol of analyte and 41 μmol of matrixes **1-4** or 8.0 μmol of **5** in 300 μL of CDCl<sub>3</sub> using 3 mm NMR tubes. All DOSY measurements were carried out non-spinning on an 11.74 Tesla Bruker AVANCE-III spectrometer, equipped with a 5mm BBO SmartProbe, with a z-gradient coil producing a nominal maximum gradient of 50 G cm<sup>-1</sup>, operating at 499.87 and 470.29 MHz for <sup>1</sup>H and <sup>19</sup>F, respectively.

The pulse sequence chosen to measure diffusion coefficients was the Oneshot45 for <sup>1</sup>H and <sup>19</sup>F nuclei. The data were acquired with 32 gradient amplitudes (TD 2), 32K points (TD 1), 32 scans (NS) and 32 dummy scans (DS). The delay for gradient recovery (d16) and duration of the gradient purge pulse (p19) were fixed at 0.2 and 0.6 ms, respectively. The diffusion delay Δ (d20) and the diffusion-encoding pulse duration δ (p30) were optimized for each compound. The experiments were carried out at 25 °C unless stated otherwise.

Diffusion coefficients were obtained using the GNAT<sup>1</sup> software, with two zero fillings and reference deconvolution<sup>2</sup> and DOSY maps were plotted using the software Origin 8.1. The errors in Tables S1-S42 are the standard errors estimated in the fitting procedure.

## **$\Delta D$ of diastereoisomeric complexes.**

Table S1: difference in diffusion values ( $\Delta D$ ) of the diastereoisomeric complexes.

| Entry | Analyte:CSA                                     | $\Delta D^a$ | Error <sup>a</sup> |
|-------|-------------------------------------------------|--------------|--------------------|
| 1     | <b>6/7:1</b>                                    | 0.22         | 0.21               |
| 2     | <b>6/7:2</b>                                    | 0.28         | 0.24               |
| 3     | <b>8/9:1</b>                                    | 0.20         | 0.16               |
| 4     | <b>8/9:2</b>                                    | 0.20         | 0.17               |
| 5     | <b>8/9:5</b>                                    | 0.57         | 0.08               |
| 6     | <b>10:1</b>                                     | 0.19         | 0.10               |
| 7     | <b>10:2</b>                                     | 0.20         | 0.10               |
| 8     | <b>11:1</b>                                     | 0.23         | 0.09               |
| 9     | <b>11:2</b>                                     | 0.20         | 0.10               |
| 10    | <b>12:1</b>                                     | 0.82         | 0.17               |
| 11    | <b>12:2</b>                                     | 0.95         | 0.17               |
| 12    | <b>13:1</b>                                     | 0.34         | 0.16               |
| 13    | <b>13:2</b>                                     | 0.35         | 0.12               |
| 14    | <b>14:1</b>                                     | 0.55         | 0.19               |
| 15    | <b>14:2</b>                                     | 0.55         | 0.08               |
| 16    | <b>15:1</b>                                     | 0.74         | 0.40               |
| 17    | <b>15:2</b>                                     | 0.59         | 0.15               |
| 18    | <b>16:1</b>                                     | 0.0          | 0.0                |
| 19    | <b>16:2</b>                                     | 0.0          | 0.0                |
| 20    | <b>16:3</b>                                     | 0.0          | 0.0                |
| 21    | <b>16:4</b>                                     | 0.0          | 0.0                |
| 22    | <b>17:3</b>                                     | 0.15         | 0.18               |
| 23    | <b>17:4</b>                                     | 0.21         | 0.19               |
| 24    | <b>18:1</b>                                     | 0.45         | 0.12               |
| 25    | <b>18:2</b>                                     | 0.24         | 0.10               |
| 26    | <b>18:3</b>                                     | 0.29         | 0.16               |
| 27    | <b>18:4</b>                                     | 0.28         | 0.15               |
| 28    | <b>19:1</b>                                     | 0.0          | 0.0                |
| 29    | <b>19:2</b>                                     | 0.0          | 0.0                |
| 30    | <b>19:3</b>                                     | 0.0          | 0.0                |
| 31    | <b>19:4</b>                                     | 0.0          | 0.0                |
| 32    | <b>19:5</b> ( <sup>19</sup> F{ <sup>1</sup> H}) | 1.56         | 0.33               |
| 33    | <b>19:5</b> ( <sup>1</sup> H)                   | 0.21         | 0.14               |
| 34    | <b>20:1</b> ( <sup>19</sup> F{ <sup>1</sup> H}) | 1.03         | 0.32               |
| 35    | <b>20:1</b> ( <sup>1</sup> H)                   | 0.36         | 0.19               |
| 36    | <b>20:2</b> ( <sup>19</sup> F{ <sup>1</sup> H}) | 1.54         | 0.19               |
| 37    | <b>20:2</b> ( <sup>1</sup> H)                   | 0.54         | 0.13               |
| 38    | <b>20:5</b> ( <sup>19</sup> F{ <sup>1</sup> H}) | 0.43         | 0.08               |
| 39    | <b>20:5</b> ( <sup>1</sup> H)                   | 0.06         | 0.17               |
| 40    | <b>21:1</b> ( <sup>19</sup> F{ <sup>1</sup> H}) | 1.47         | 0.17               |
| 41    | <b>21:1</b> ( <sup>1</sup> H)                   | 0.15         | 0.18               |
| 42    | <b>21:2</b> ( <sup>19</sup> F{ <sup>1</sup> H}) | 1.16         | 0.13               |
| 43    | <b>21:2</b> ( <sup>1</sup> H)                   | 0.17         | 0.12               |
| 44    | <b>21:5</b> ( <sup>19</sup> F{ <sup>1</sup> H}) | 0.91         | 0.13               |
| 45    | <b>21:5</b> ( <sup>1</sup> H)                   | 0.45         | 0.14               |
| 46    | <b>22:1</b>                                     | 0.30         | 0.04               |
| 47    | <b>22:2</b>                                     | 0.32         | 0.03               |
| 48    | <b>22:3</b>                                     | 1.23         | 0.10               |
| 49    | <b>22:4</b>                                     | 1.22         | 0.14               |
| 50    | <b>22:5</b>                                     | 0.22         | 0.09               |

<sup>a</sup>  $\times 10^{-10} \text{ m}^2\text{s}^{-1}$ .

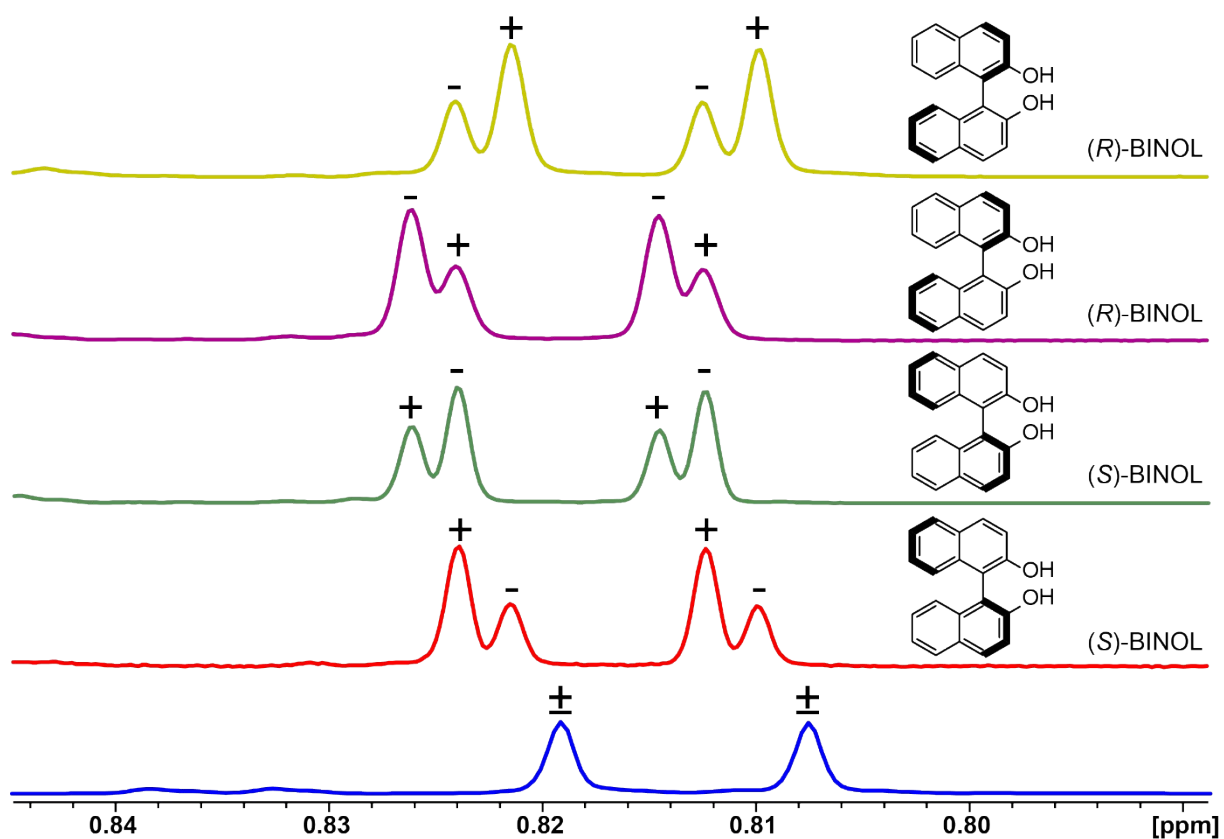

Figure S1: 500 MHz  $^1\text{H}$  NMR of (+) and (-)-menthol and (R) or (S)-BINOL as CSA. From bottom to top: racemic menthol (blue); excess of (+)-menthol and (S)-BINOL as CSA (red); excess of (-)-menthol and (S)-BINOL as CSA (green); excess of (-)-menthol and (R)-BINOL as CSA (purple); excess of (+)-menthol and (R)-BINOL as CSA (yellow)

The following image is an example of how the difference between diffusion coefficients was calculated for signals with multiplicity higher than 1.

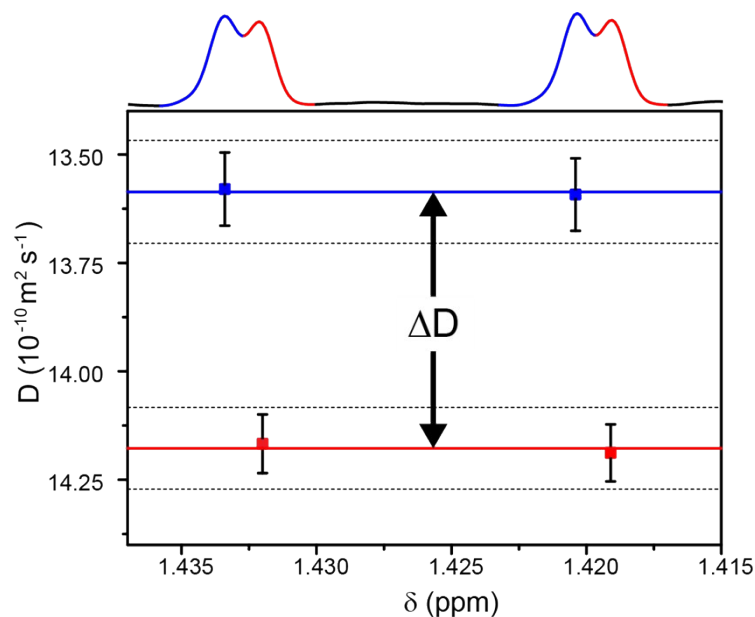

Figure S2: 500 MHz  $^1\text{H}$  MAD projections with the least attenuated 1D spectrum shown at the top, for 2'-NO<sub>2</sub>-1-phenylethanol and (S)-BINOL

In Fig. S2 each diastereoisomeric complex presents one doublet, represented in red or blue and each transition of the doublet exhibits its own  $D$  (colored squares). The average of each doublet is expressed by the straight line of the same color and the dot line is the respective error of the fitting procedure. The  $\Delta D$  is then calculated by the difference between both straight lines following the ensuing formula:

$$\bar{D} = \frac{D_1 + D_2}{2} \pm \sqrt{\text{error}_1^2 + \text{error}_2^2} = \frac{13.58 + 13.59}{2} \pm \sqrt{0.08^2 + 0.08^2}$$

$$\bar{D} = 13.59 \pm 0.12$$

$$\bar{D} = \frac{D_1 + D_2}{2} \pm \sqrt{\text{error}_1^2 + \text{error}_2^2} = \frac{14.17 + 14.19}{2} \pm \sqrt{0.07^2 + 0.07^2}$$

$$\bar{D} = 14.18 \pm 0.09$$

$$\Delta D = \bar{D} - \bar{D} \pm \sqrt{\text{error}^2 + \text{error}^2}$$

$$\Delta D = 14.18 - 13.59 \pm \sqrt{0.12^2 + 0.09^2}$$

$$\Delta D = 0.59 \pm 0.15$$

**500 MHz  $^1\text{H}$  MAD projections and measured diffusion coefficients of diastereoisomeric complexes.**

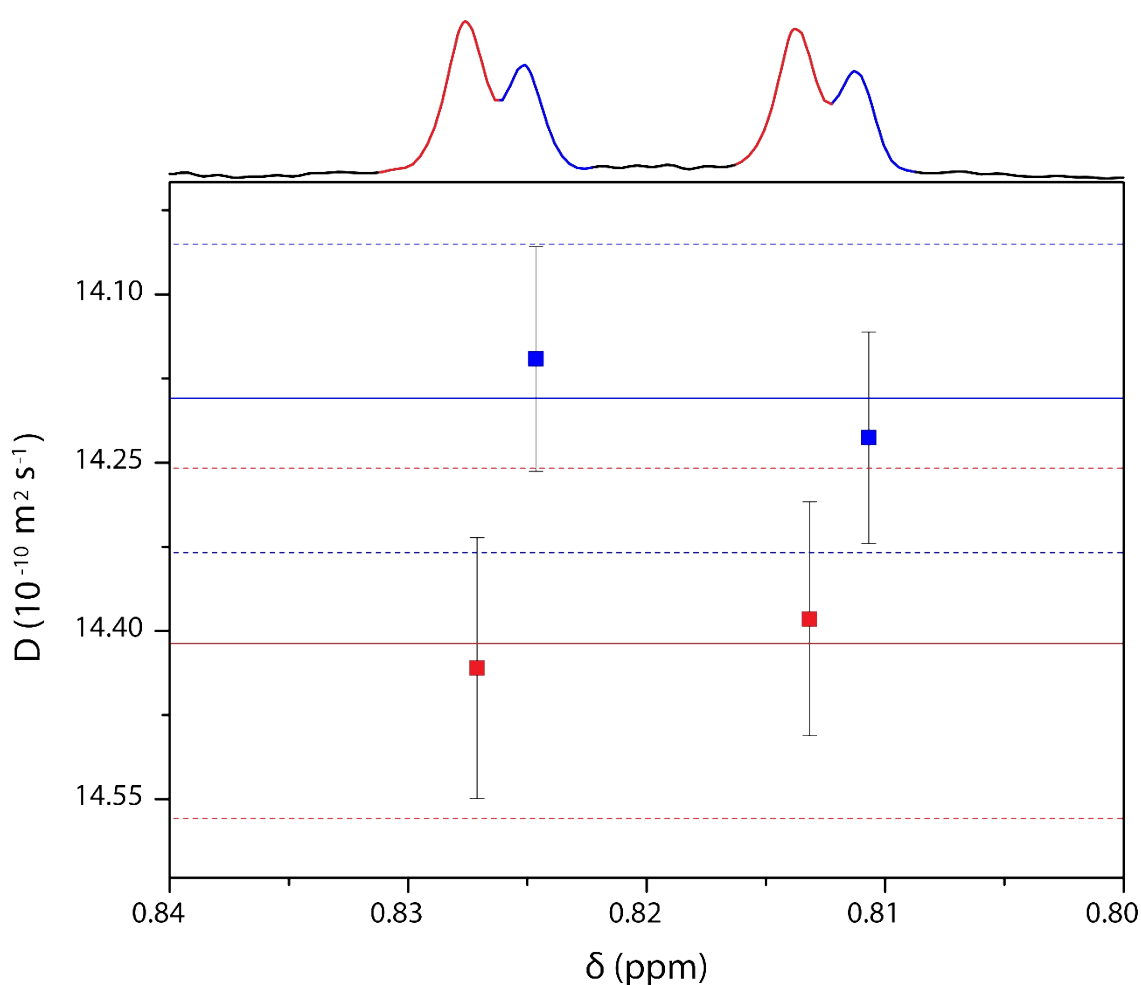

Figure S3: 500 MHz  $^1\text{H}$  MAD projections, with the least attenuated 1D spectrum shown at the top, for compounds **6** and **7** with matrix **1**

Table S1: Measured  $^1\text{H}$  diffusion coefficients of compounds **6** and **7** with matrix **1**

| Chemical Shift | Exp Amplitude | Fit. Amplitude | Error   | Diffusion coefficient <sup>a</sup> | Error <sup>a</sup> |
|----------------|---------------|----------------|---------|------------------------------------|--------------------|
| 0.81069        | 1.83774       | 1.88250        | 0.00703 | 14.20115                           | 0.09163            |
| 0.81317        | 2.69824       | 2.75841        | 0.00947 | 14.29452                           | 0.08462            |
| 0.82464        | 1.90680       | 1.95299        | 0.00735 | 14.16563                           | 0.09220            |
| 0.82711        | 2.60667       | 2.67378        | 0.01149 | 14.35075                           | 0.10610            |

<sup>a</sup>  $\times 10^{-10} \text{ m}^2\text{s}^{-1}$ .

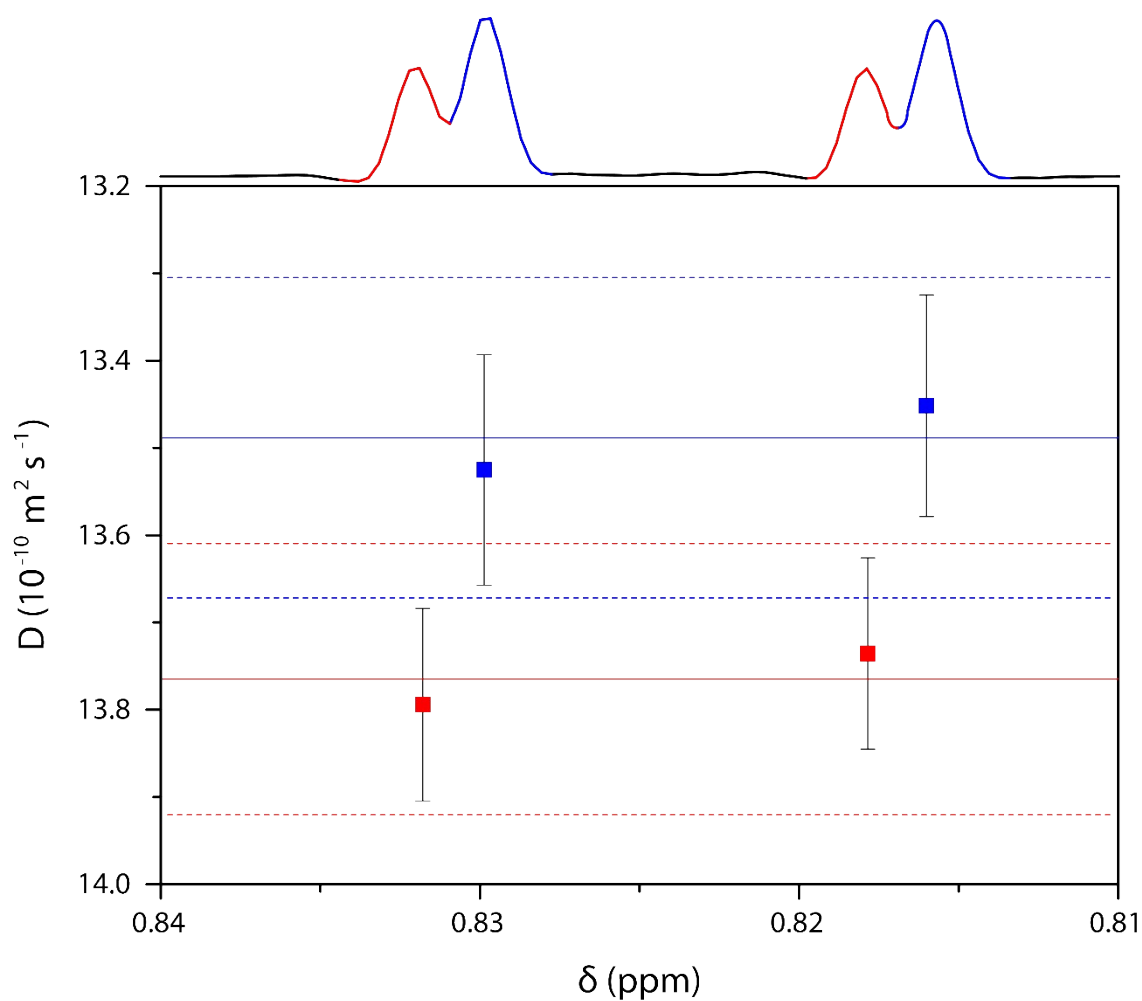

Figure S4: 500 MHz  $^1\text{H}$  MAD projections, with the least attenuated 1D spectrum shown at the top, for compounds **6** and **7** with matrix **2**

Table S2: Measured  $^1\text{H}$  diffusion coefficients of compounds **6** and **7** with matrix **2**

| Chemical Shift | Exp Amplitude | Fit. Amplitude | Error   | Diffusion coefficient <sup>a</sup> | Error <sup>a</sup> |
|----------------|---------------|----------------|---------|------------------------------------|--------------------|
| 0.81601        | 3.16413       | 3.25539        | 0.01739 | 13.45170                           | 0.12705            |
| 0.81785        | 1.89178       | 1.94027        | 0.00884 | 13.73564                           | 0.10960            |
| 0.82987        | 3.08017       | 3.18431        | 0.01766 | 13.52534                           | 0.13231            |
| 0.83179        | 1.63426       | 1.68135        | 0.00769 | 13.79421                           | 0.11037            |

<sup>a</sup>  $\times 10^{-10} \text{ m}^2\text{s}^{-1}$ .

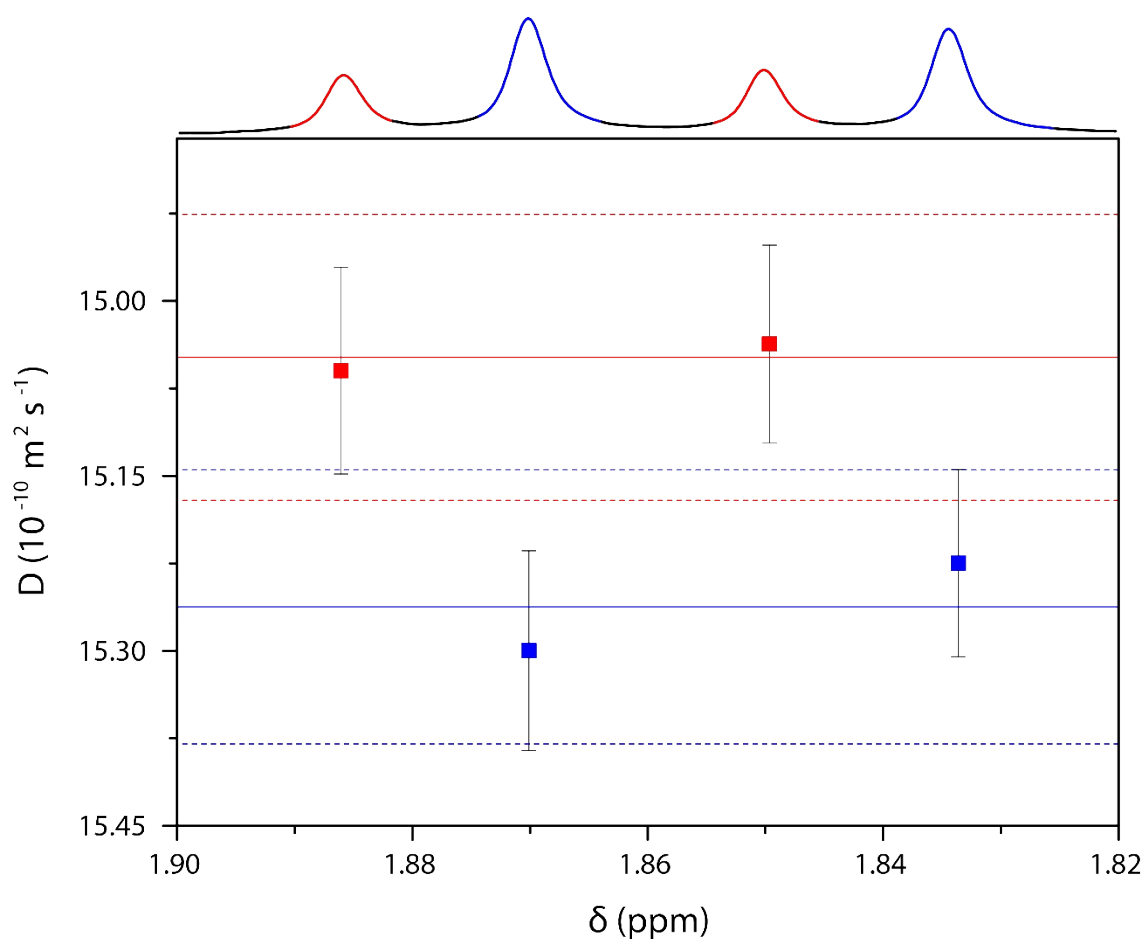

Figure S5: 500 MHz  $^1\text{H}$  MAD projections, with the least attenuated 1D spectrum shown at the top, for compounds **8** and **9** with matrix **1**

Table S3: Measured  $^1\text{H}$  diffusion coefficients of compounds **8** and **9** with matrix **1**

| Chemical Shift | Exp Amplitude | Fit. Amplitude | Error   | Diffusion coefficient <sup>a</sup> | Error <sup>a</sup> |
|----------------|---------------|----------------|---------|------------------------------------|--------------------|
| 1.83360        | 1.15353       | 1.17542        | 0.00311 | 15.18982                           | 0.07498            |
| 1.84965        | 0.72405       | 0.74075        | 0.00208 | 15.01451                           | 0.07918            |
| 1.87010        | 1.28234       | 1.30945        | 0.00369 | 15.25986                           | 0.07987            |
| 1.88606        | 0.65486       | 0.67133        | 0.00197 | 15.03576                           | 0.08269            |

<sup>a</sup>  $\times 10^{-10} \text{ m}^2 \text{ s}^{-1}$ .



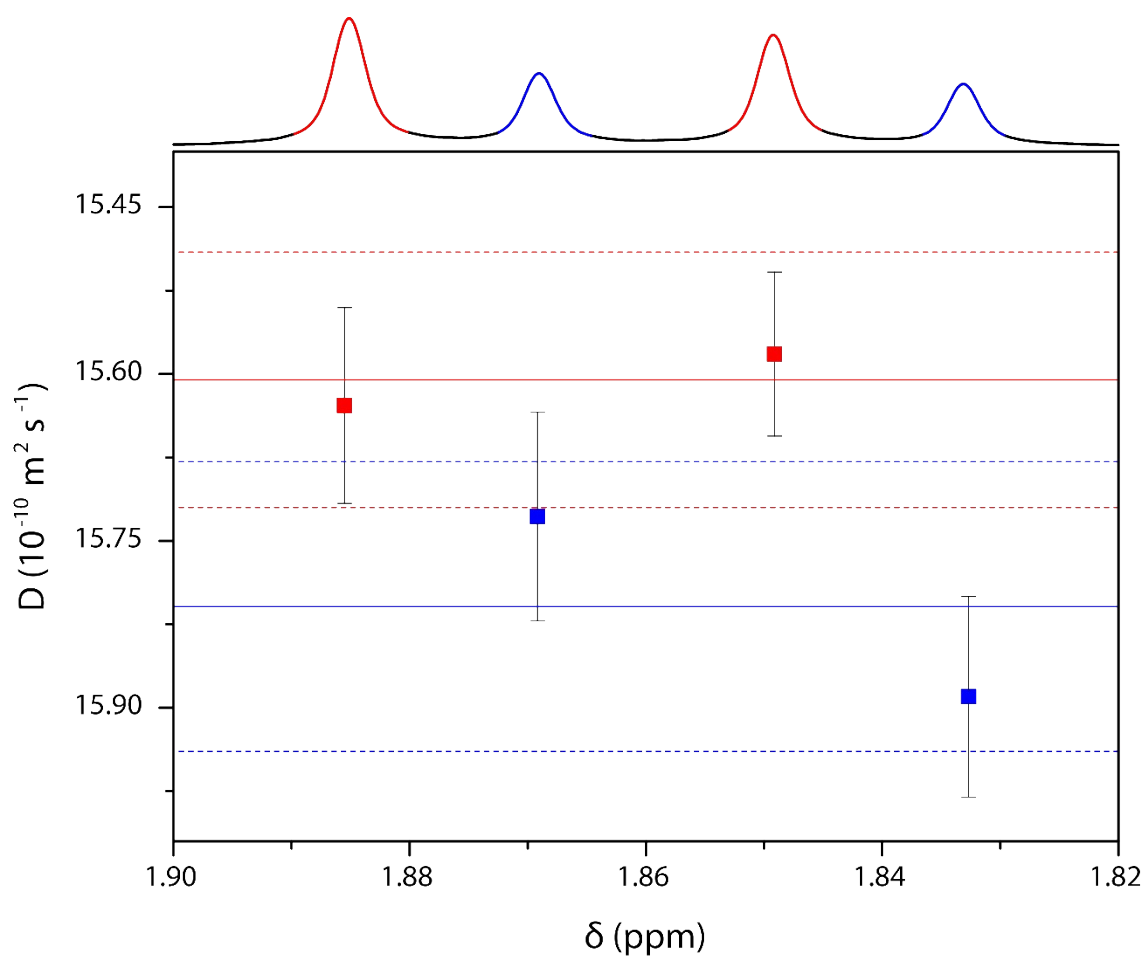

Figure S6: 500 MHz  $^1\text{H}$  MAD projections, with the least attenuated 1D spectrum shown at the top, for compounds **8** and **9** with matrix **2**

Table S4: Measured  $^1\text{H}$  diffusion coefficients of compounds **8** and **9** with matrix **2**

| Chemical Shift | Exp Amplitude | Fit. Amplitude | Error   | Diffusion coefficient <sup>a</sup> | Error <sup>a</sup> |
|----------------|---------------|----------------|---------|------------------------------------|--------------------|
| 1.83268        | 0.56628       | 0.57852        | 0.00180 | 15.89014                           | 0.09020            |
| 1.84910        | 1.09474       | 1.11299        | 0.00286 | 15.58205                           | 0.07361            |
| 1.86918        | 0.65354       | 0.66838        | 0.00218 | 15.72805                           | 0.09379            |
| 1.88551        | 1.00919       | 1.02785        | 0.00315 | 15.62822                           | 0.08799            |

<sup>a</sup>  $\times 10^{-10} \text{ m}^2\text{s}^{-1}$ .

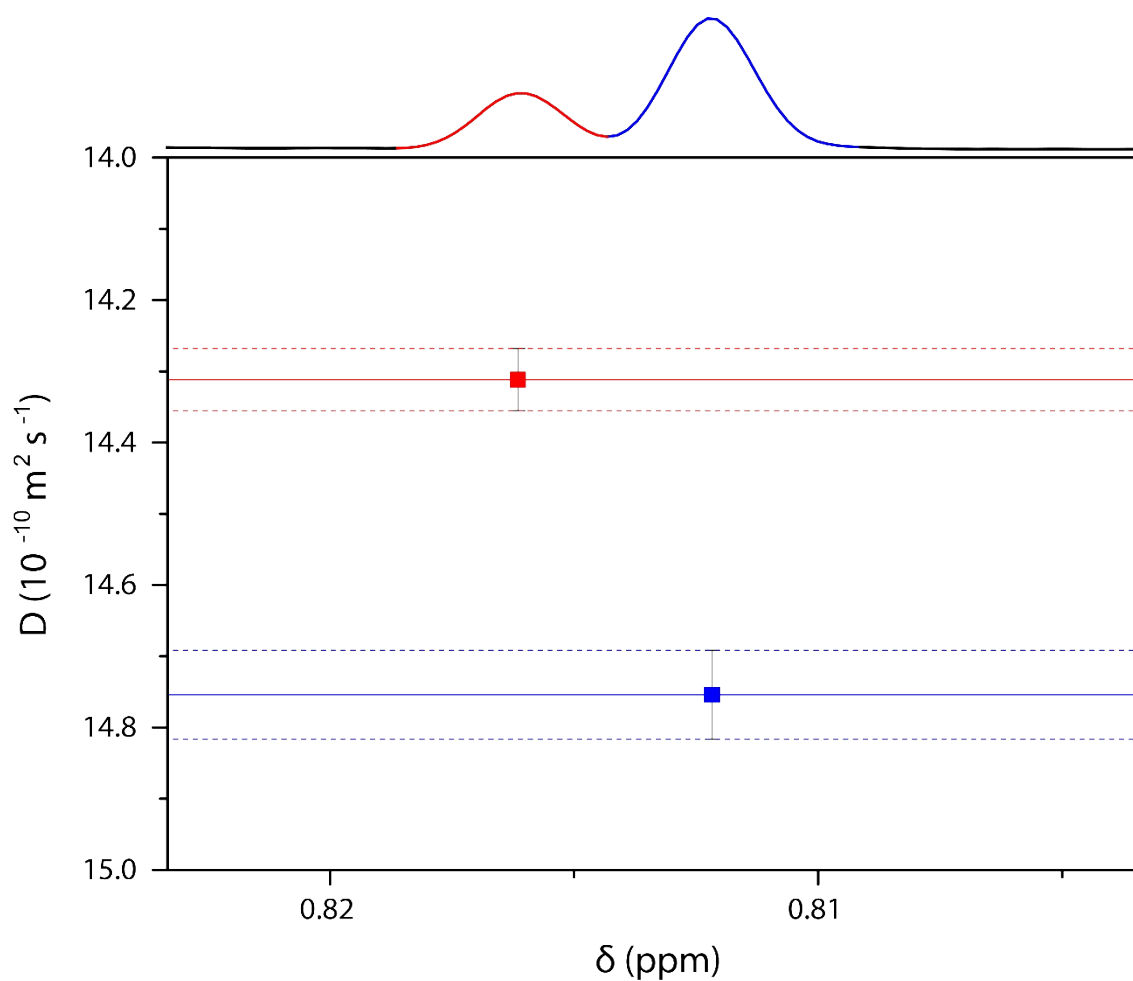

Figure S7: 500 MHz  $^1\text{H}$  MAD projections, with the least attenuated 1D spectrum shown at the top, for compounds **8** and **9** with matrix **5**

Table S5: Measured  $^1\text{H}$  diffusion coefficients of compounds **8** and **9** with matrix **5**

| Chemical Shift | Exp Amplitude | Fit. Amplitude | Error   | Diffusion coefficient <sup>a</sup> | Error <sup>a</sup> |
|----------------|---------------|----------------|---------|------------------------------------|--------------------|
| 0.81326        | 36.34134      | 36.85960       | 0.09496 | 14.84569                           | 0.06495            |
| 0.81923        | 18.71638      | 18.91266       | 0.03158 | 14.27944                           | 0.04111            |

<sup>a</sup>  $\times 10^{-10} \text{ m}^2\text{s}^{-1}$ .

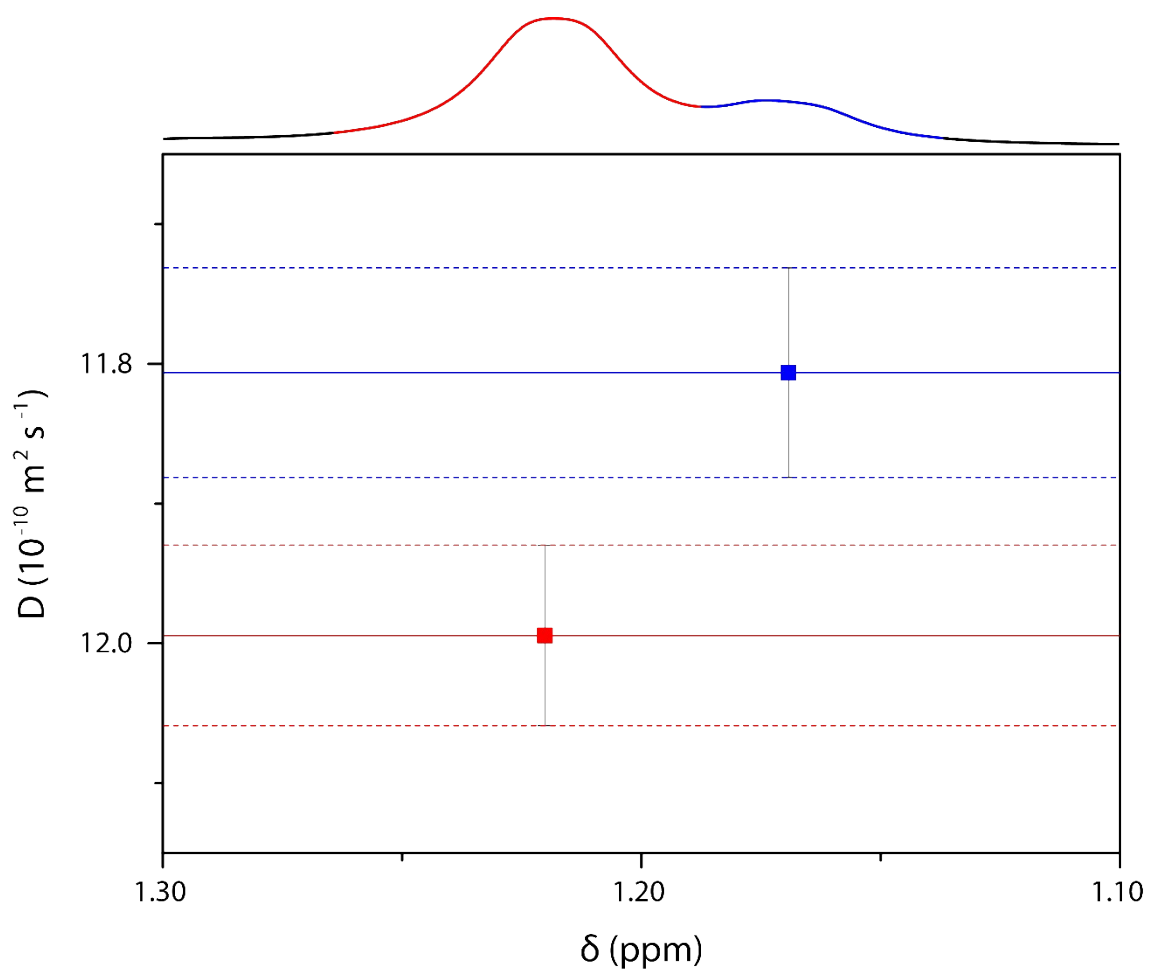

Figure S8: 500 MHz  $^1\text{H}$  MAD projections, with the least attenuated 1D spectrum shown at the top, for compound **10** with matrix **1**

Table S6: Measured  $^1\text{H}$  diffusion coefficients of compound **10** with matrix **1**

| Chemical Shift | Exp Amplitude | Fit. Amplitude | Error   | Diffusion coefficient <sup>a</sup> | Error <sup>a</sup> |
|----------------|---------------|----------------|---------|------------------------------------|--------------------|
| 1.16924        | 5.65285       | 5.72963        | 0.01935 | 11.80636                           | 0.07495            |
| 1.22015        | 18.56703      | 18.84099       | 0.05437 | 11.99430                           | 0.06456            |

<sup>a</sup>  $\times 10^{-10} \text{ m}^2\text{s}^{-1}$ .

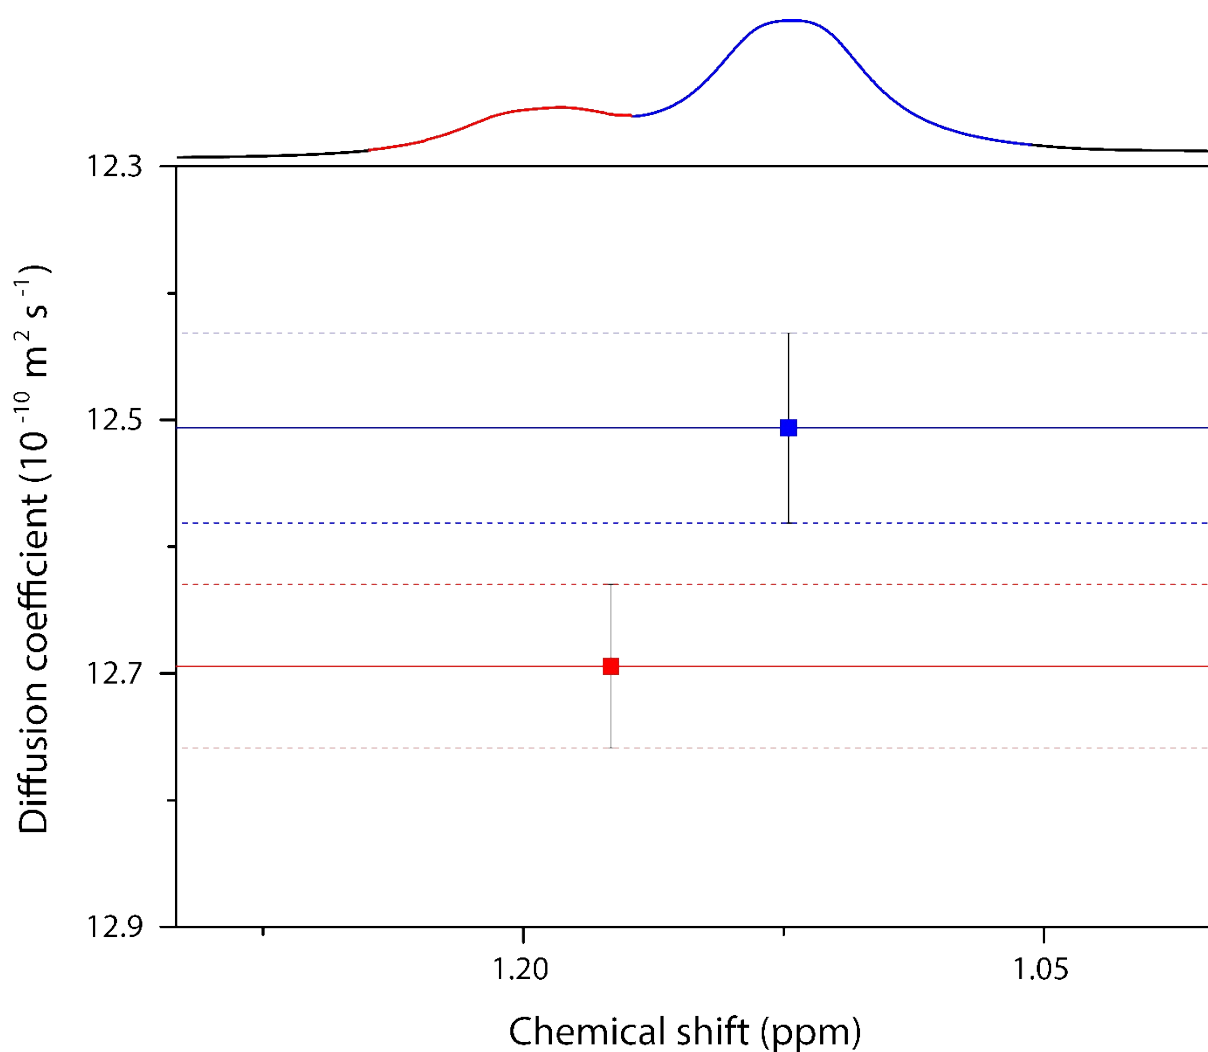

Figure S9: 500 MHz  $^1\text{H}$  MAD projections, with the least attenuated 1D spectrum shown at the top, for compound **10** with matrix **2**

Table S7: Measured  $^1\text{H}$  diffusion coefficients of compound **10** with matrix **2**

| Chemical Shift | Exp Amplitude | Fit. Amplitude | Error   | Diffusion coefficient <sup>a</sup> | Error <sup>a</sup> |
|----------------|---------------|----------------|---------|------------------------------------|--------------------|
| 1.16924        | 5.65285       | 5.72963        | 0.01935 | 12.50254                           | 0.06941            |
| 1.22015        | 18.56703      | 18.84099       | 0.05437 | 12.69810                           | 0.07012            |

<sup>a</sup>  $\times 10^{-10} \text{ m}^2\text{s}^{-1}$ .

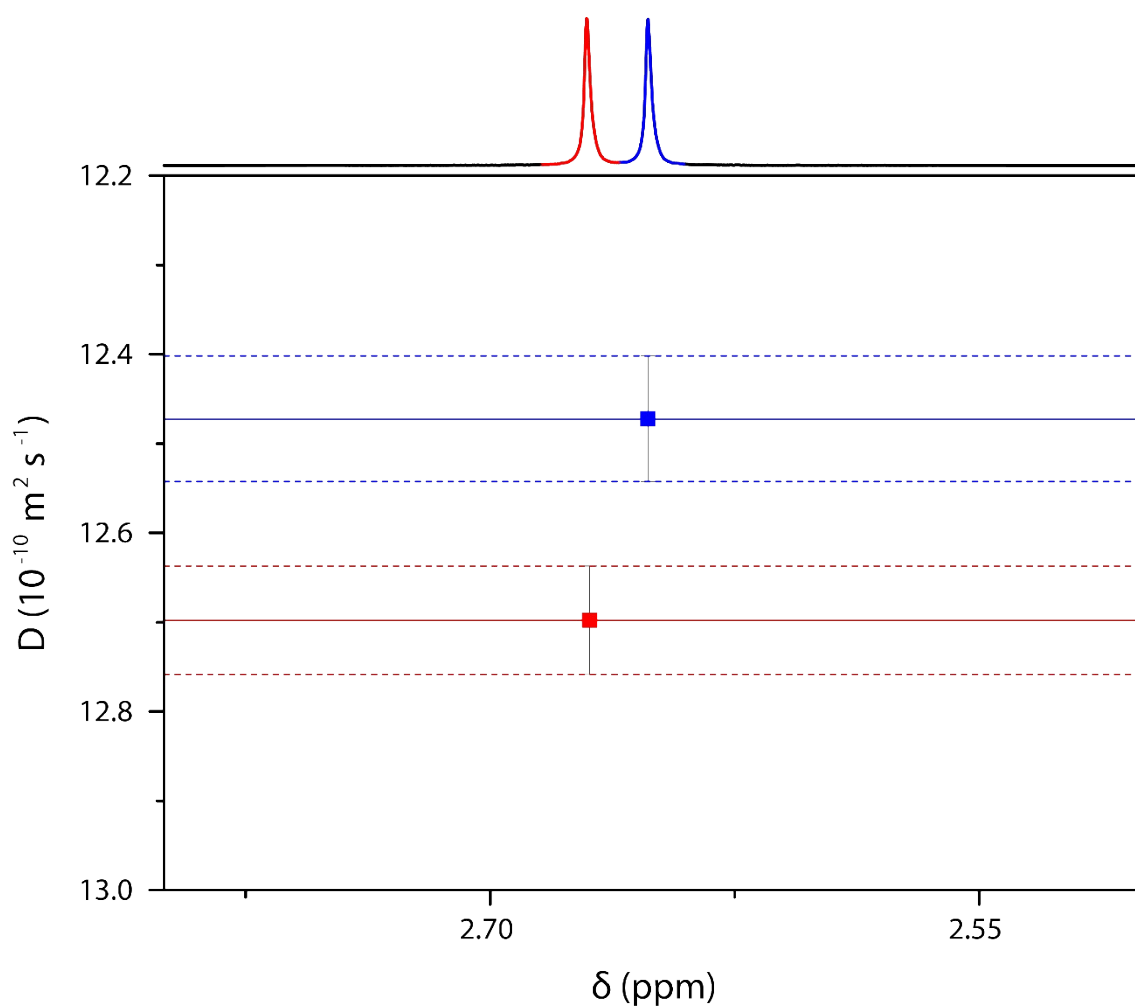

Figure S10: 500 MHz  $^1\text{H}$  MAD projections, with the least attenuated 1D spectrum shown at the top, for compound **11** with matrix **1**

Table S8: Measured  $^1\text{H}$  diffusion coefficients of compound **11** with matrix **1**

| Chemical Shift | Exp Amplitude | Fit. Amplitude | Error   | Diffusion coefficient <sup>a</sup> | Error <sup>a</sup> |
|----------------|---------------|----------------|---------|------------------------------------|--------------------|
| 2.68855        | 7.78752       | 7.90098        | 0.02082 | 12.69798                           | 0.06071            |
| 2.70882        | 7.77404       | 7.92039        | 0.02442 | 12.47229                           | 0.07036            |

<sup>a</sup>  $\times 10^{-10} \text{ m}^2\text{s}^{-1}$ .

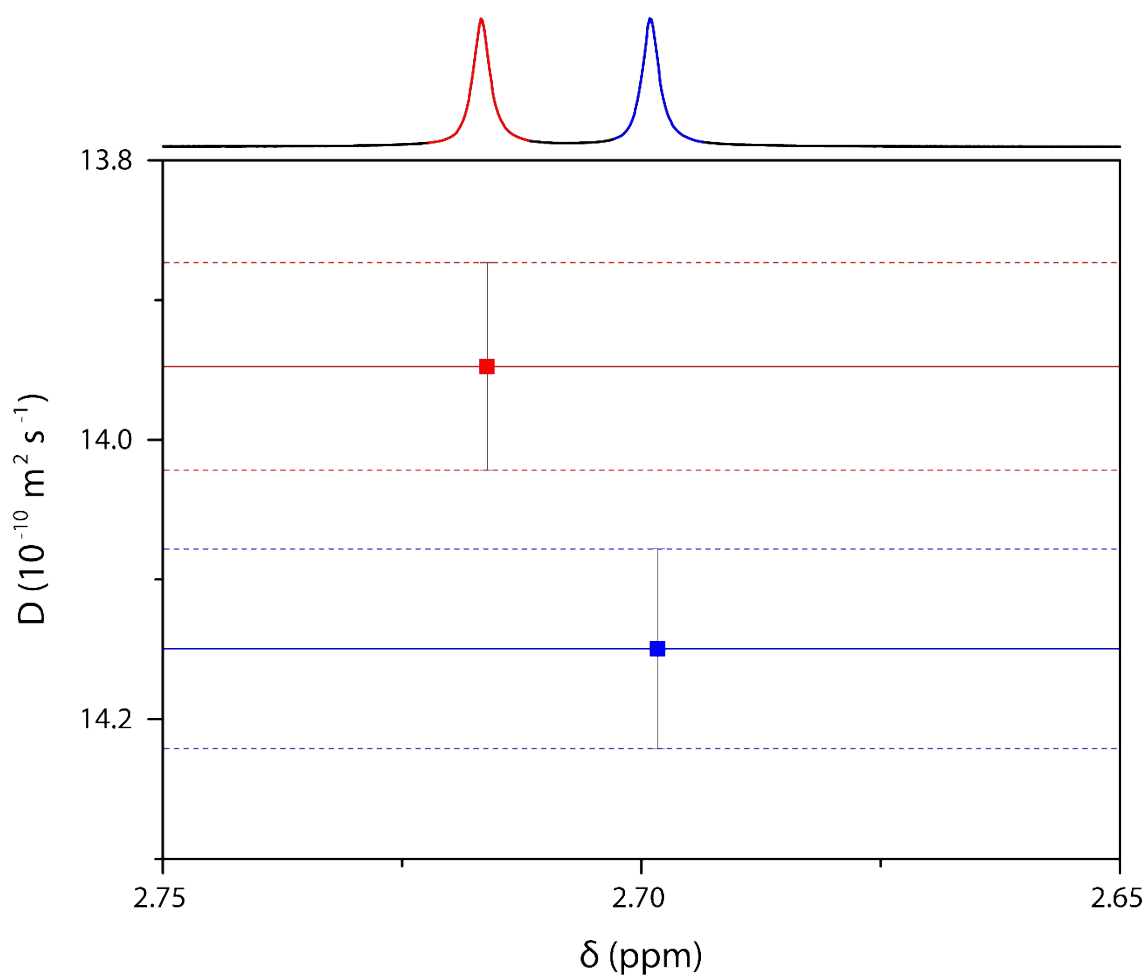

Figure S11: 500 MHz  $^1\text{H}$  MAD projections, with the least attenuated 1D spectrum shown at the top, for compound **11** with matrix **2**

Table S9: Measured  $^1\text{H}$  diffusion coefficients of compound **11** with matrix **2**

| Chemical Shift | Exp Amplitude | Fit. Amplitude | Error   | Diffusion coefficient <sup>a</sup> | Error <sup>a</sup> |
|----------------|---------------|----------------|---------|------------------------------------|--------------------|
| 2.69830        | 5.11227       | 5.19924        | 0.01443 | 14.14955                           | 0.07146            |
| 2.71610        | 5.15640       | 5.24320        | 0.01524 | 13.94748                           | 0.07426            |

<sup>a</sup>  $\times 10^{-10} \text{ m}^2\text{s}^{-1}$ .

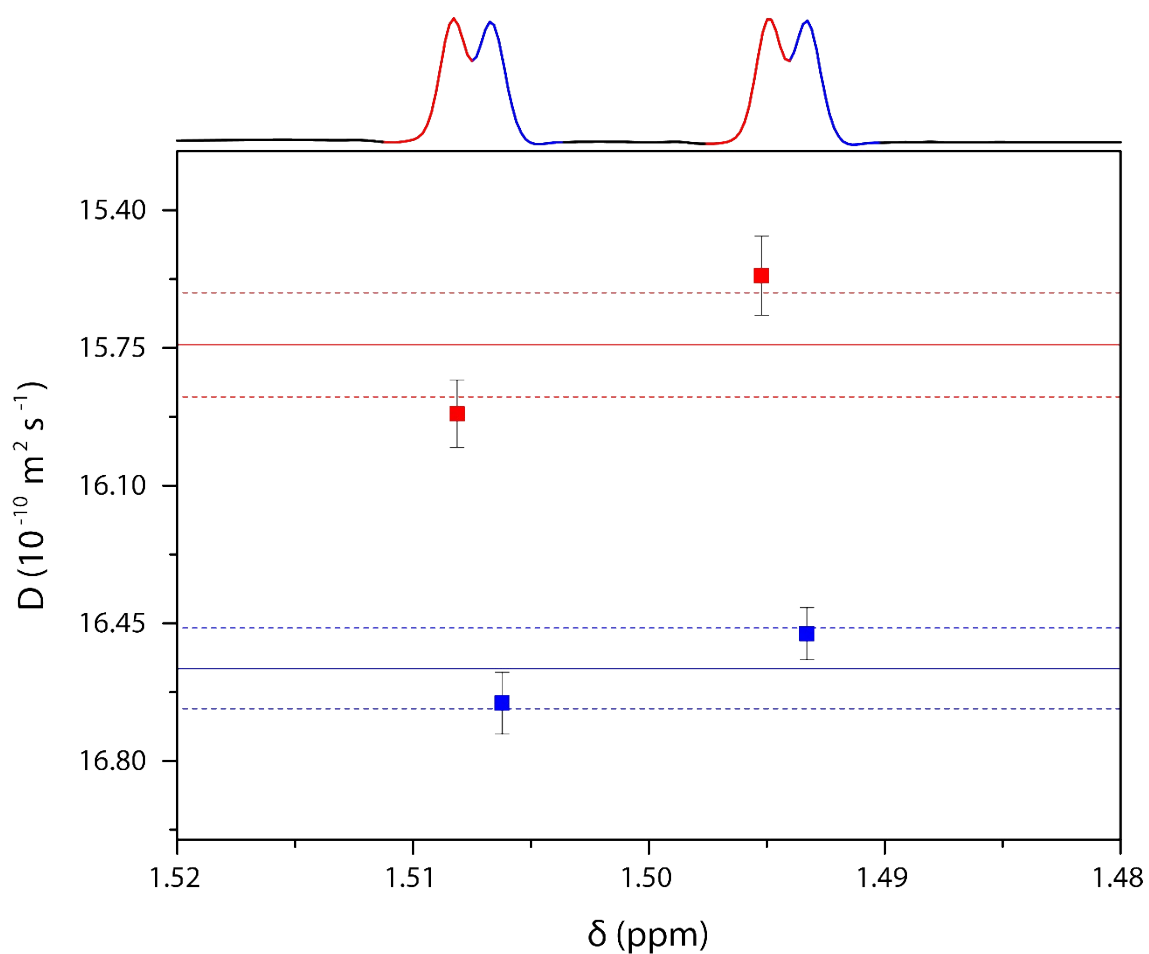

Figure S12: 500 MHz  $^1\text{H}$  MAD projections, with the least attenuated 1D spectrum shown at the top, for compound **12** with matrix **1**

Table S10: Measured  $^1\text{H}$  diffusion coefficients of compound **12** with matrix **1**

| Chemical Shift | Exp Amplitude | Fit. Amplitude | Error   | Diffusion coefficient <sup>a</sup> | Error <sup>a</sup> |
|----------------|---------------|----------------|---------|------------------------------------|--------------------|
| 1.49330        | 2.40316       | 2.42239        | 0.00546 | 16.47628                           | 0.06654            |
| 1.49522        | 2.68906       | 2.75857        | 0.00970 | 15.56655                           | 0.10076            |
| 1.50622        | 2.58960       | 2.59309        | 0.00683 | 16.65316                           | 0.07823            |
| 1.50814        | 2.88342       | 2.93713        | 0.00867 | 15.91765                           | 0.08562            |

<sup>a</sup>  $\times 10^{-10} \text{ m}^2\text{s}^{-1}$ .

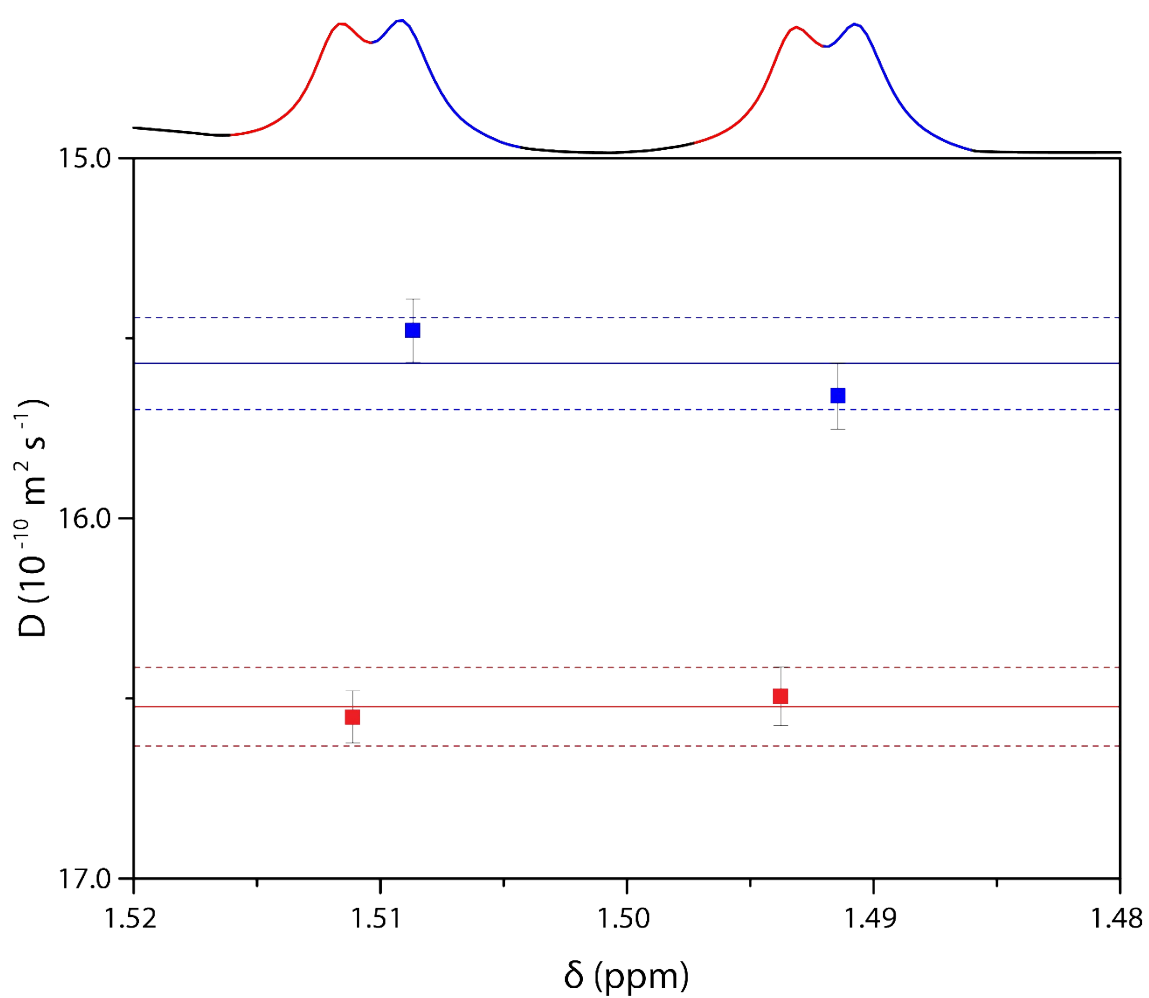

Figure S13: 500 MHz  $^1\text{H}$  MAD projections, with the least attenuated 1D spectrum shown at the top, for compound **12** with matrix **2**

Table S11: Measured  $^1\text{H}$  diffusion coefficients of compound **12** with matrix **2**

| Chemical Shift | Exp Amplitude | Fit. Amplitude | Error   | Diffusion coefficient <sup>a</sup> | Error <sup>a</sup> |
|----------------|---------------|----------------|---------|------------------------------------|--------------------|
| 1.49358        | 2.26943       | 2.30307        | 0.00742 | 15.66057                           | 0.09257            |
| 1.49532        | 2.32781       | 2.36063        | 0.00650 | 16.49386                           | 0.08139            |
| 1.50651        | 2.26684       | 2.29921        | 0.00706 | 15.47889                           | 0.08775            |
| 1.50834        | 2.38837       | 2.42235        | 0.00592 | 16.55122                           | 0.07236            |

<sup>a</sup>  $\times 10^{-10} \text{ m}^2\text{s}^{-1}$ .



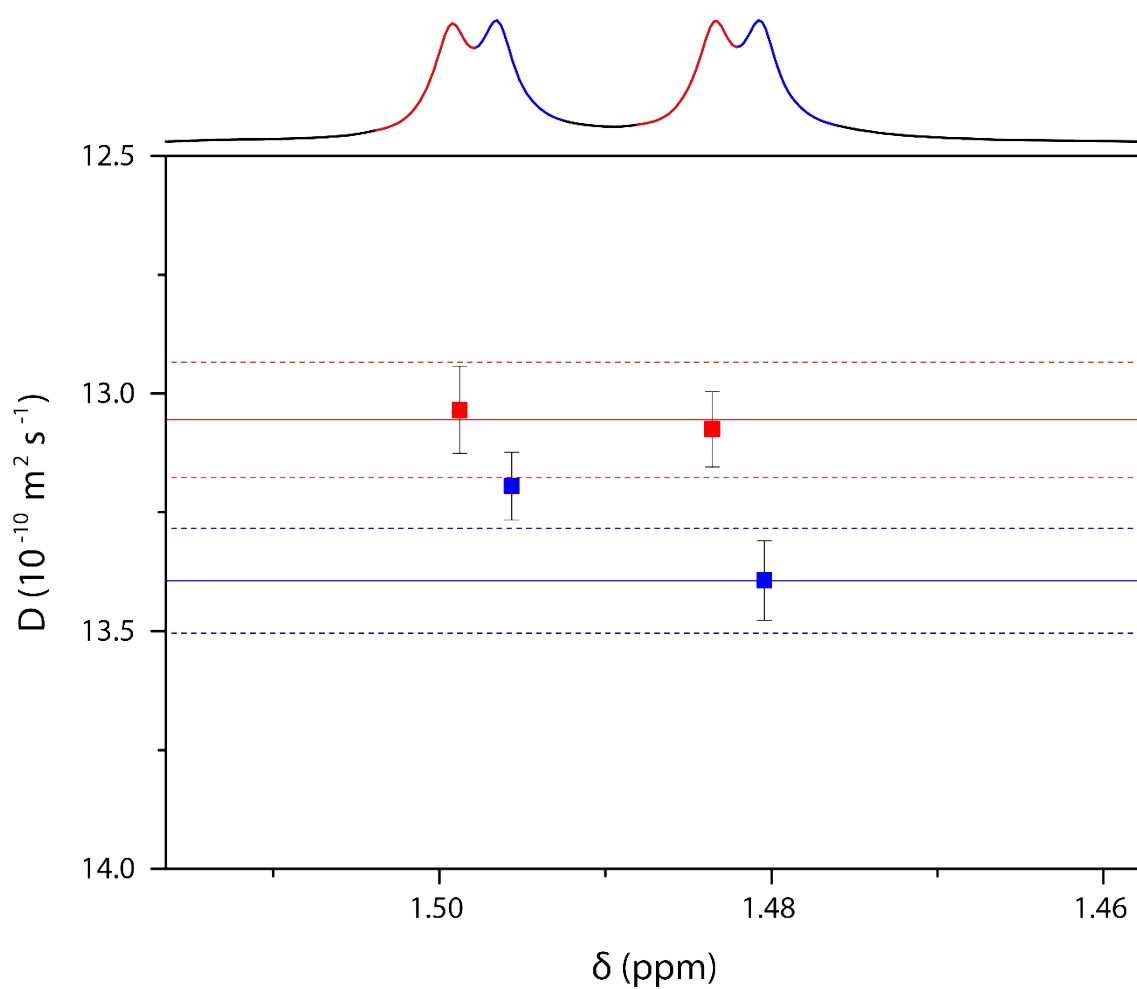

Figure S14: 500 MHz  $^1\text{H}$  MAD projections, with the least attenuated 1D spectrum shown at the top, for compound **13** with matrix **1**

Table S12: Measured  $^1\text{H}$  diffusion coefficients of compound **13** with matrix **1**

| Chemical Shift | Exp Amplitude | Fit. Amplitude | Error   | Diffusion coefficient <sup>a</sup> | Error <sup>a</sup> |
|----------------|---------------|----------------|---------|------------------------------------|--------------------|
| 1.47936        | 4.20744       | 4.22713        | 0.01482 | 13.39325                           | 0.08389            |
| 1.48202        | 3.62022       | 3.66103        | 0.01240 | 13.07517                           | 0.07929            |
| 1.49229        | 4.19327       | 4.22670        | 0.01282 | 13.19483                           | 0.07137            |
| 1.49495        | 4.34861       | 4.38867        | 0.01720 | 13.03435                           | 0.09161            |

<sup>a</sup>  $\times 10^{-10} \text{ m}^2\text{s}^{-1}$ .

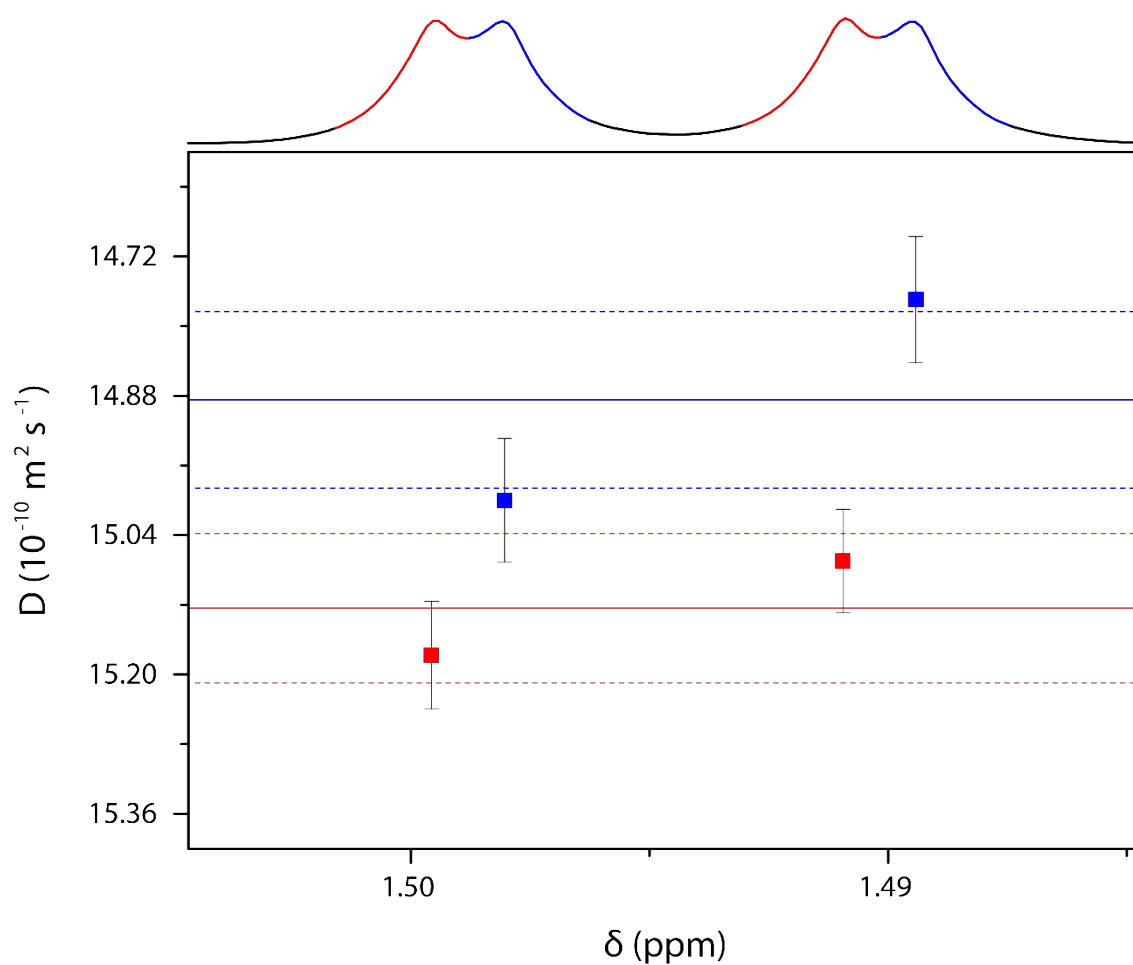

Figure S15: 500 MHz  $^1\text{H}$  MAD projections, with the least attenuated 1D spectrum shown at the top, for compound **13** with matrix **2**

Table S13: Measured  $^1\text{H}$  diffusion coefficients of compound **13** with matrix **2**

| Chemical Shift | Exp Amplitude | Fit. Amplitude | Error   | Diffusion coefficient <sup>a</sup> | Error <sup>a</sup> |
|----------------|---------------|----------------|---------|------------------------------------|--------------------|
| 1.48064        | 4.62294       | 4.72908        | 0.01513 | 13.55113                           | 0.07639            |
| 1.48321        | 4.72615       | 4.81238        | 0.01336 | 13.74725                           | 0.06682            |
| 1.49358        | 4.75583       | 4.85238        | 0.01158 | 13.80693                           | 0.05760            |
| 1.49614        | 4.79185       | 4.84910        | 0.00708 | 14.30571                           | 0.03601            |

<sup>a</sup>  $\times 10^{-10} \text{ m}^2\text{s}^{-1}$ .

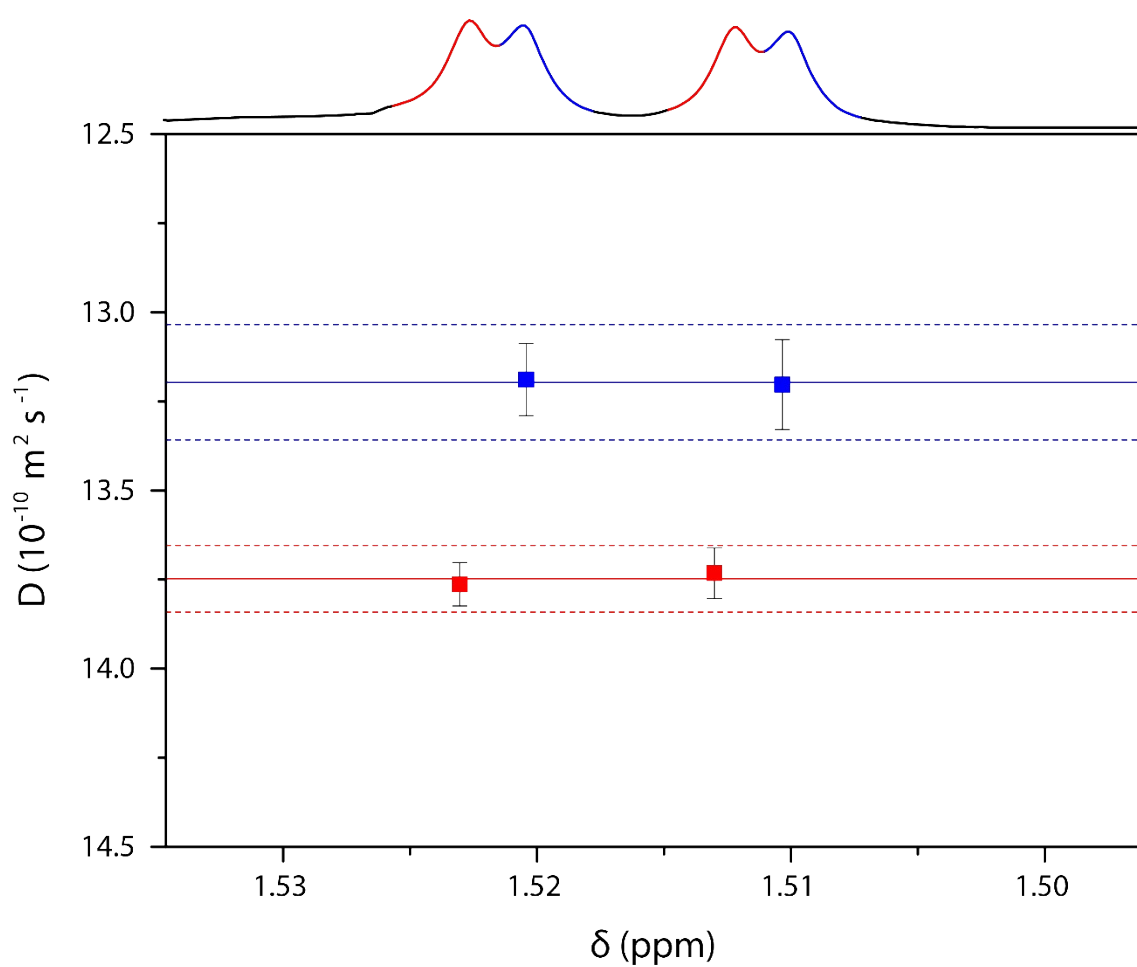

Figure S16: 500 MHz  $^1\text{H}$  MAD projections, with the least attenuated 1D spectrum shown at the top, for compound **14** with matrix **1**

Table S14: Measured  $^1\text{H}$  diffusion coefficients of compound **14** with matrix **1**

| Chemical Shift | Exp Amplitude | Fit. Amplitude | Error   | Diffusion coefficient <sup>a</sup> | Error <sup>a</sup> |
|----------------|---------------|----------------|---------|------------------------------------|--------------------|
| 1.50844        | 1.42912       | 1.47091        | 0.00788 | 13.20300                           | 0.12615            |
| 1.51192        | 1.12779       | 1.14599        | 0.00338 | 13.73167                           | 0.07088            |
| 1.52155        | 1.18386       | 1.20932        | 0.00520 | 13.18910                           | 0.10105            |
| 1.52495        | 1.31235       | 1.32754        | 0.00336 | 13.76311                           | 0.06089            |

<sup>a</sup>  $\times 10^{-10} \text{ m}^2\text{s}^{-1}$ .

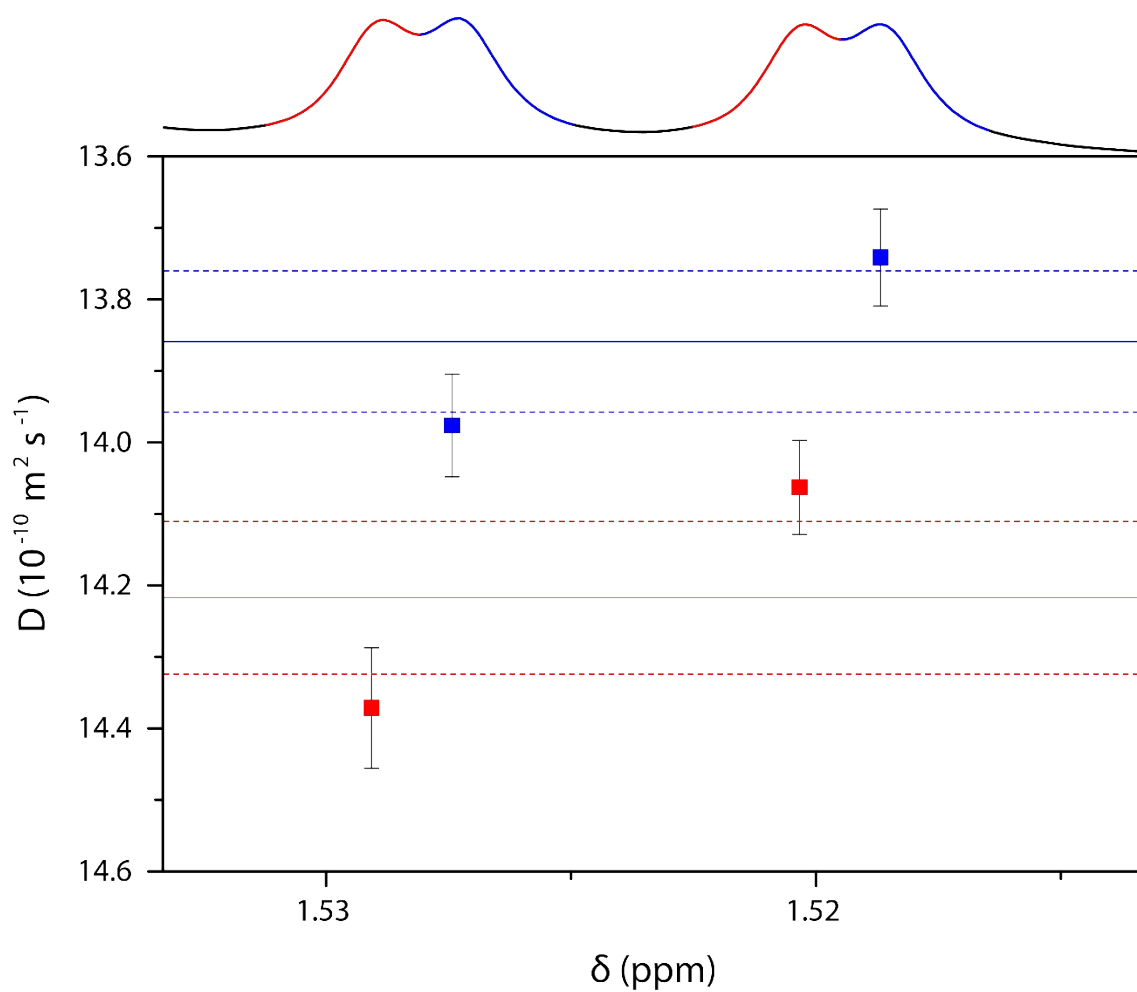

Figure S17: 500 MHz  $^1\text{H}$  MAD projections, with the least attenuated 1D spectrum shown at the top, for compound **14** with matrix **2**

Table S15: Measured  $^1\text{H}$  diffusion coefficients of compound **14** with matrix **2**

| Chemical Shift | Exp Amplitude | Fit. Amplitude | Error   | Diffusion coefficient <sup>a</sup> | Error <sup>a</sup> |
|----------------|---------------|----------------|---------|------------------------------------|--------------------|
| 1.51302        | 7.30044       | 7.39424        | 0.01390 | 13.97072                           | 0.04568            |
| 1.51550        | 6.71414       | 6.80521        | 0.01145 | 14.04935                           | 0.04102            |
| 1.52614        | 7.66127       | 7.70830        | 0.00901 | 14.24562                           | 0.02875            |
| 1.52861        | 8.44555       | 8.41592        | 0.01807 | 15.27327                           | 0.05512            |

<sup>a</sup>  $\times 10^{-10} \text{ m}^2\text{s}^{-1}$ .

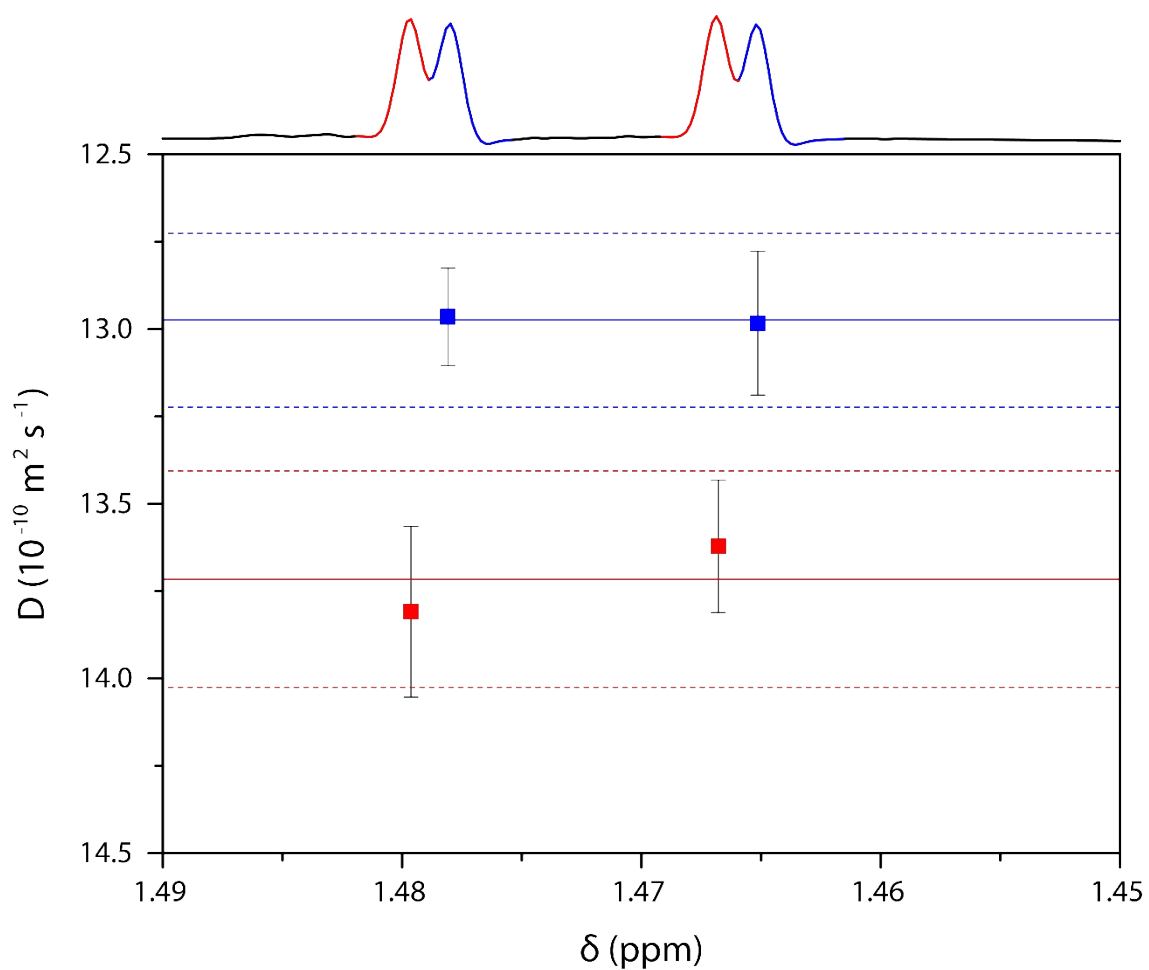

Figure S18: 500 MHz  $^1\text{H}$  MAD projections, with the least attenuated 1D spectrum shown at the top, for compound **15** with matrix **1**

Table S16: Measured  $^1\text{H}$  diffusion coefficients of compound **15** with matrix **1**

| Chemical Shift | Exp Amplitude | Fit. Amplitude | Error   | Diffusion coefficient <sup>a</sup> | Error <sup>a</sup> |
|----------------|---------------|----------------|---------|------------------------------------|--------------------|
| 1.46514        | 2.56758       | 2.50407        | 0.02093 | 12.98333                           | 0.20595            |
| 1.46679        | 2.44109       | 2.54833        | 0.01915 | 13.62187                           | 0.18966            |
| 1.47808        | 2.48768       | 2.46420        | 0.01397 | 12.96501                           | 0.13958            |
| 1.47963        | 1.80214       | 1.91122        | 0.01839 | 13.80908                           | 0.24459            |

<sup>a</sup>  $\times 10^{-10} \text{ m}^2\text{s}^{-1}$ .

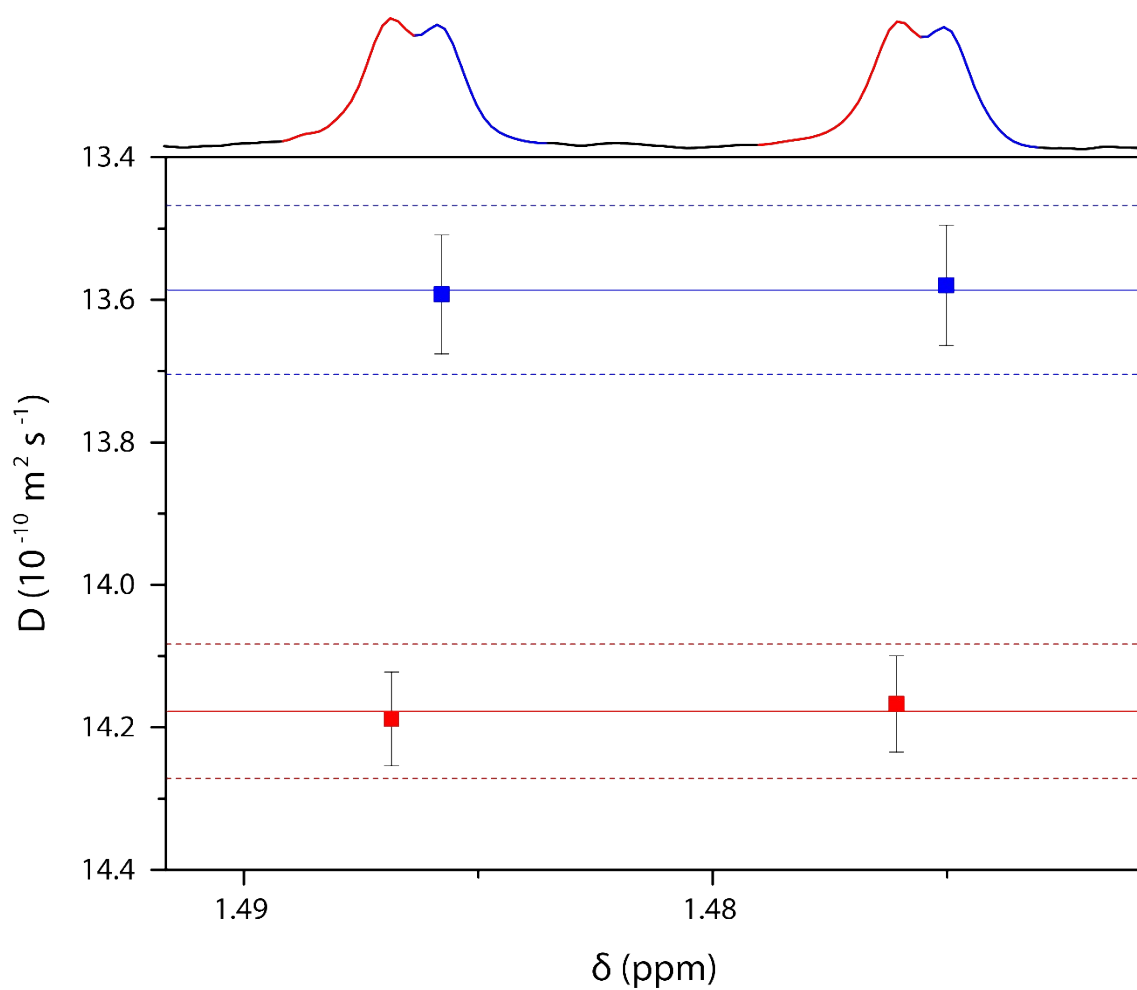

Figure S19: 500 MHz  $^1\text{H}$  MAD projections, with the least attenuated 1D spectrum shown at the top, for compound **15** with matrix **2**

Table S17: Measured  $^1\text{H}$  diffusion coefficients of compound **15** with matrix **2**

| Chemical Shift | Exp Amplitude | Fit. Amplitude | Error   | Diffusion coefficient <sup>a</sup> | Error <sup>a</sup> |
|----------------|---------------|----------------|---------|------------------------------------|--------------------|
| 1.47002        | 2.92785       | 2.99342        | 0.01003 | 13.57971                           | 0.08442            |
| 1.47130        | 2.61045       | 2.65072        | 0.00696 | 14.16703                           | 0.06760            |
| 1.48294        | 2.82113       | 2.88786        | 0.00958 | 13.59247                           | 0.08363            |
| 1.48422        | 2.68615       | 2.73388        | 0.00697 | 14.18804                           | 0.06572            |

<sup>a</sup>  $\times 10^{-10} \text{ m}^2\text{s}^{-1}$ .

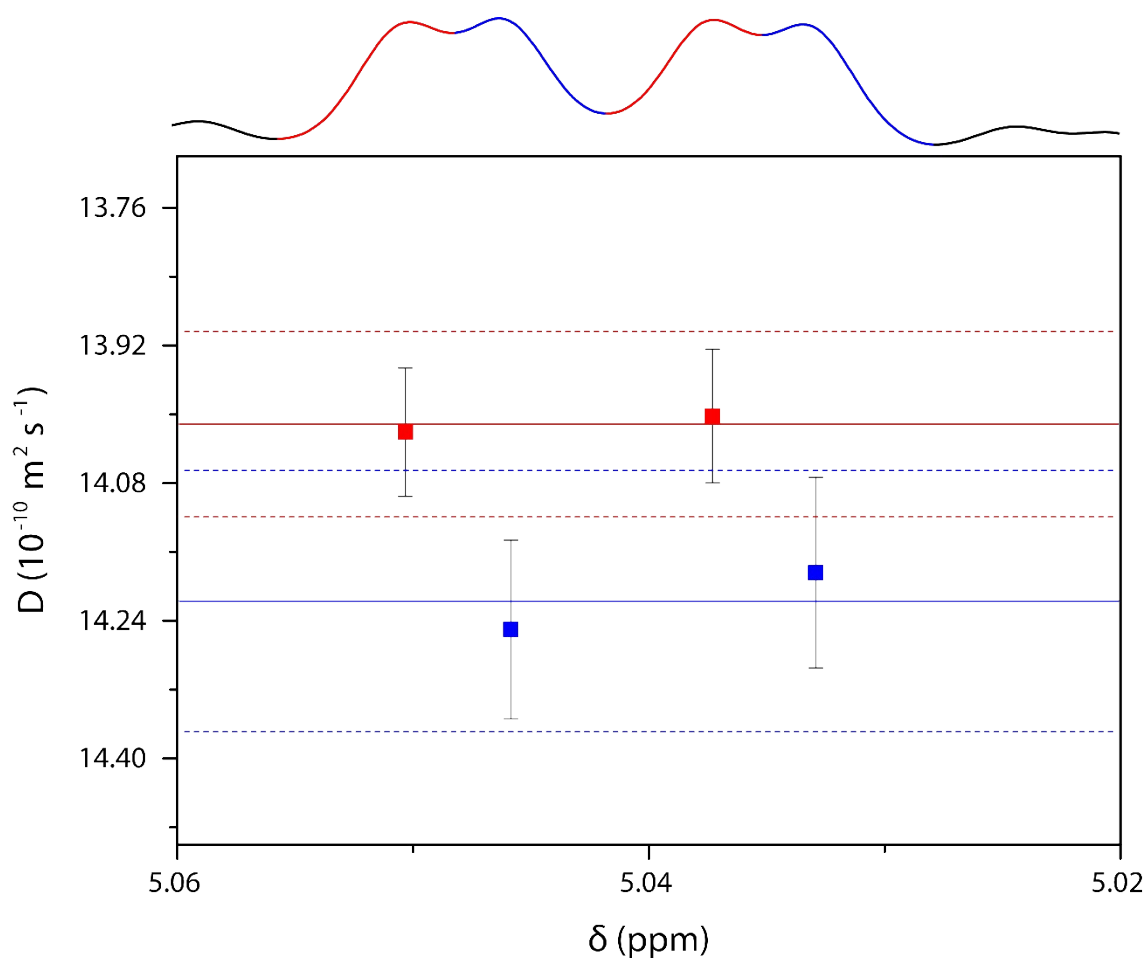

Figure S20: 500 MHz  $^1\text{H}$  MAD projections, with the least attenuated 1D spectrum shown at the top, for compound **17** with matrix **3**

Table S18: Measured  $^1\text{H}$  diffusion coefficients of compound **17** with matrix **3**

| Chemical Shift | Exp Amplitude | Fit. Amplitude | Error   | Diffusion coefficient <sup>a</sup> | Error <sup>a</sup> |
|----------------|---------------|----------------|---------|------------------------------------|--------------------|
| 5.02000        | 0.29319       | 0.30384        | 0.00236 | 14.15614                           | 0.10343            |
| 5.02449        | 0.34037       | 0.35240        | 0.00243 | 14.02536                           | 0.07427            |
| 5.03292        | 0.89992       | 0.92067        | 0.00348 | 14.20879                           | 0.09666            |
| 5.03730        | 0.96625       | 0.98478        | 0.00269 | 14.02303                           | 0.07265            |

<sup>a</sup>  $\times 10^{-10} \text{ m}^2\text{s}^{-1}$ .

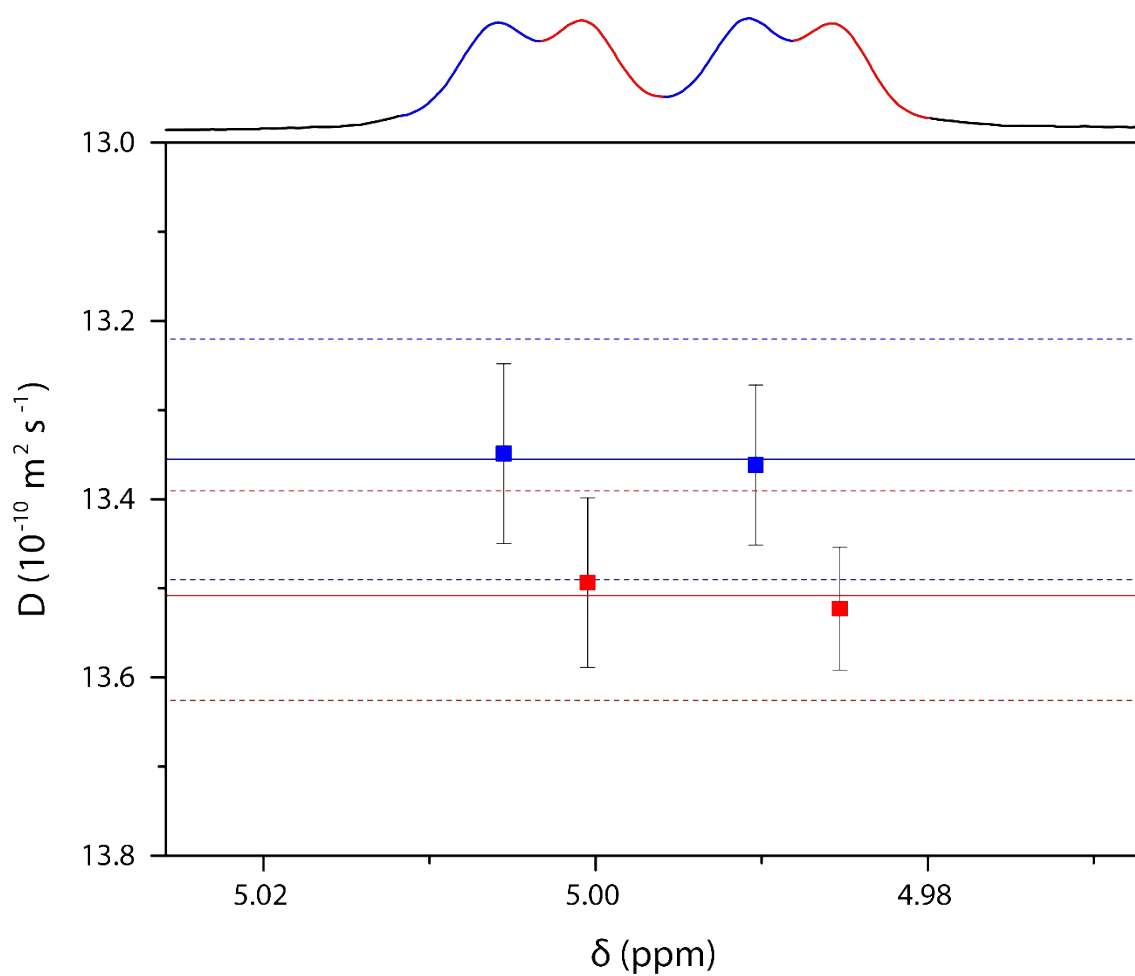

Figure S21: 500 MHz  $^1\text{H}$  MAD projections, with the least attenuated 1D spectrum shown at the top, for compound **17** with matrix **4**

Table S19: Measured  $^1\text{H}$  diffusion coefficients of compound **17** with matrix **4**

| Chemical Shift | Exp Amplitude | Fit. Amplitude | Error   | Diffusion coefficient <sup>a</sup> | Error <sup>a</sup> |
|----------------|---------------|----------------|---------|------------------------------------|--------------------|
| 5.03181        | 1.04642       | 1.05878        | 0.00414 | 13.34881                           | 0.10062            |
| 5.03649        | 1.16329       | 1.18485        | 0.00435 | 13.49348                           | 0.09511            |
| 5.04475        | 1.13104       | 1.15614        | 0.00403 | 13.36159                           | 0.08983            |
| 5.04942        | 1.22586       | 1.24517        | 0.00331 | 13.52275                           | 0.06893            |

<sup>a</sup>  $\times 10^{-10} \text{ m}^2\text{s}^{-1}$ .



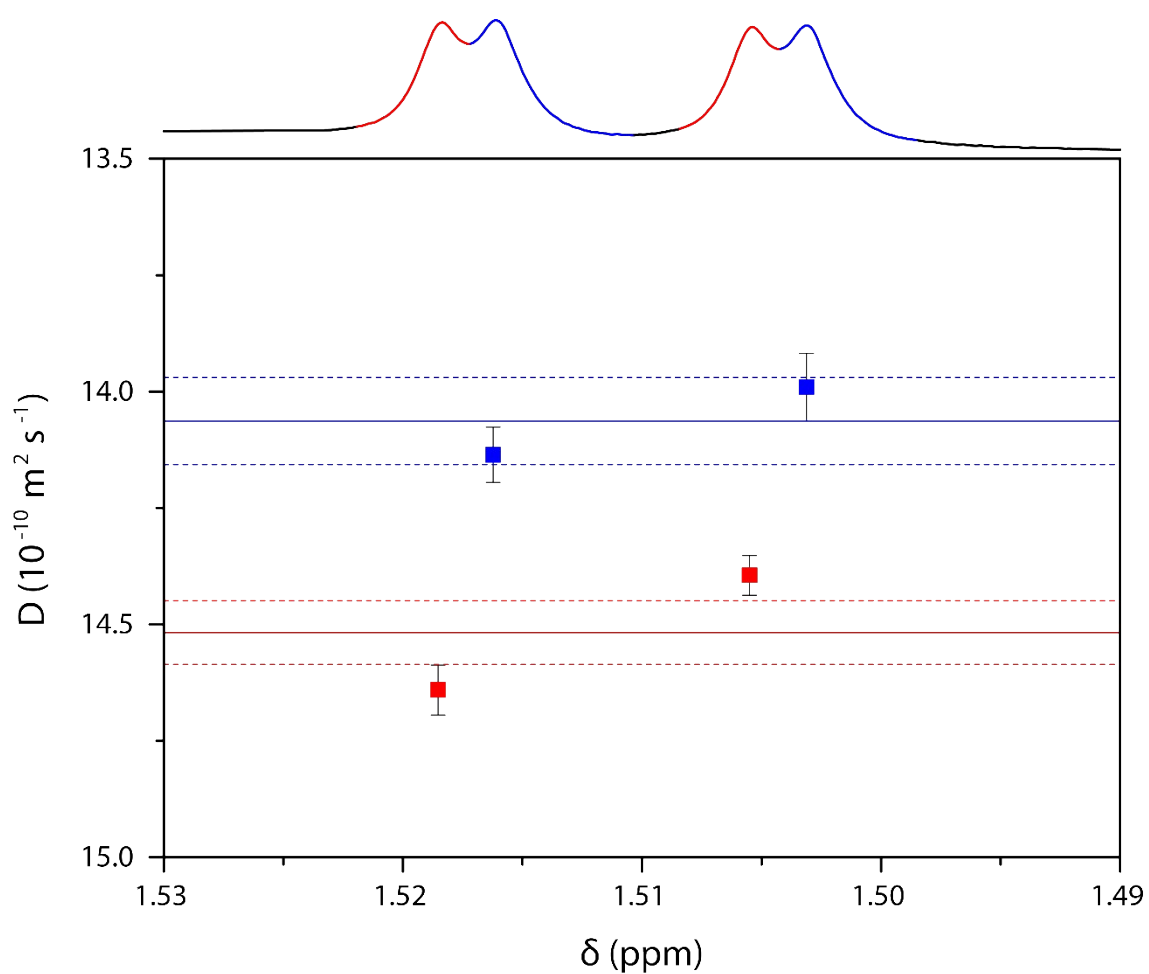

Figure S22: 500 MHz  $^1\text{H}$  MAD projections, with the least attenuated 1D spectrum shown at the top, for compound **18** with matrix **1**

Table S20: Measured  $^1\text{H}$  diffusion coefficients of compound **18** with matrix **1**

| Chemical Shift | Exp Amplitude | Fit. Amplitude | Error   | Diffusion coefficient <sup>a</sup> | Error <sup>a</sup> |
|----------------|---------------|----------------|---------|------------------------------------|--------------------|
| 1.50312        | 4.96584       | 4.98740        | 0.01414 | 13.99049                           | 0.07254            |
| 1.50550        | 4.21720       | 4.25686        | 0.00698 | 14.39462                           | 0.04261            |
| 1.51623        | 4.83496       | 4.88606        | 0.01125 | 14.13577                           | 0.05924            |
| 1.51853        | 3.49139       | 3.52643        | 0.00720 | 14.64094                           | 0.05351            |

<sup>a</sup>  $\times 10^{-10} \text{ m}^2\text{s}^{-1}$ .

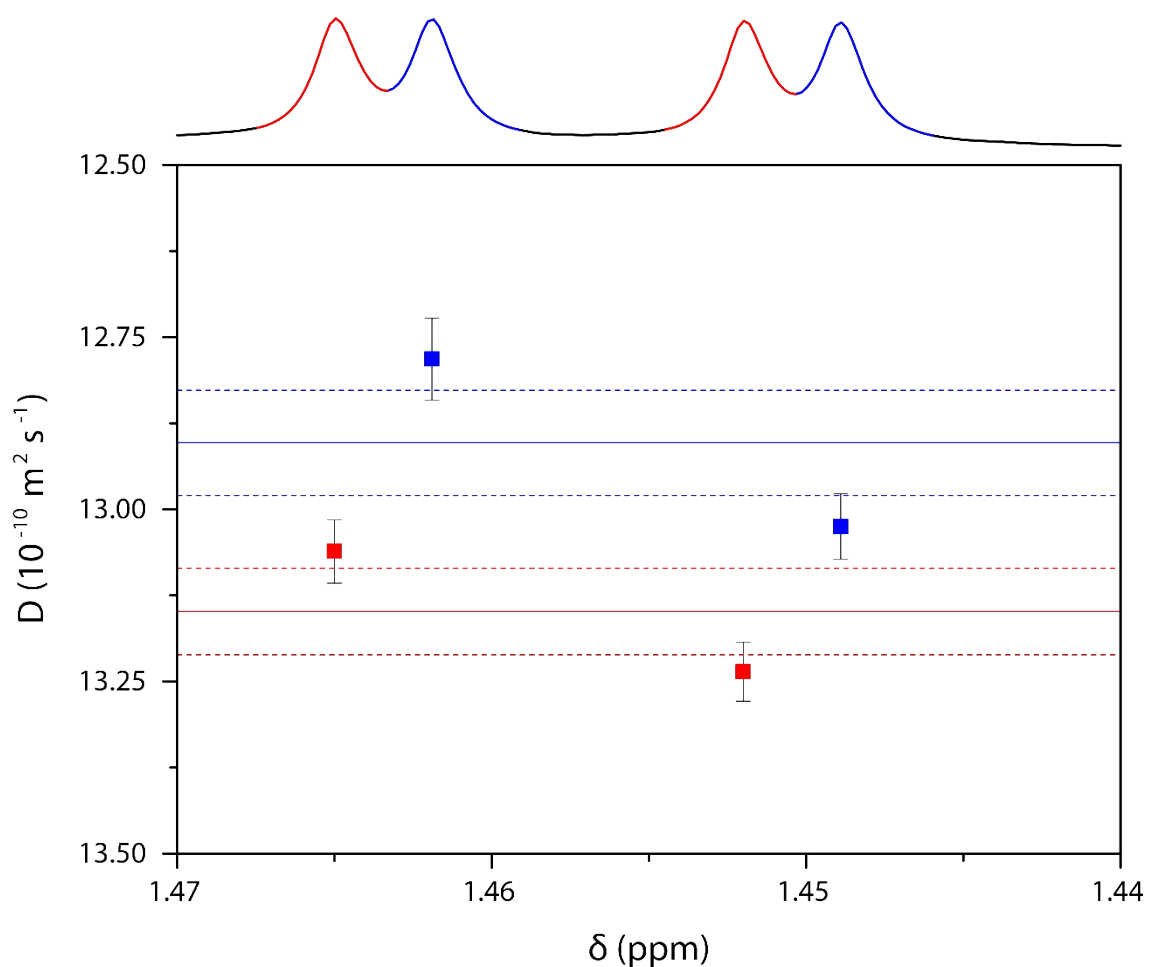

Figure S23: 500 MHz  $^1\text{H}$  MAD projections, with the least attenuated 1D spectrum shown at the top, for compound **18** with matrix **2**

Table S21: Measured  $^1\text{H}$  diffusion coefficients of compound **18** with matrix **2**

| Chemical Shift | Exp Amplitude | Fit. Amplitude | Error   | Diffusion coefficient <sup>a</sup> | Error <sup>a</sup> |
|----------------|---------------|----------------|---------|------------------------------------|--------------------|
| 1.49514        | 1.89598       | 1.91188        | 0.00376 | 13.06111                           | 0.04606            |
| 1.49825        | 1.83147       | 1.85980        | 0.00479 | 12.78197                           | 0.05953            |
| 1.50816        | 1.86166       | 1.87271        | 0.00342 | 13.23589                           | 0.04299            |
| 1.51128        | 1.97308       | 1.99480        | 0.00407 | 13.02503                           | 0.04763            |

<sup>a</sup>  $\times 10^{-10} \text{ m}^2 \text{ s}^{-1}$ .

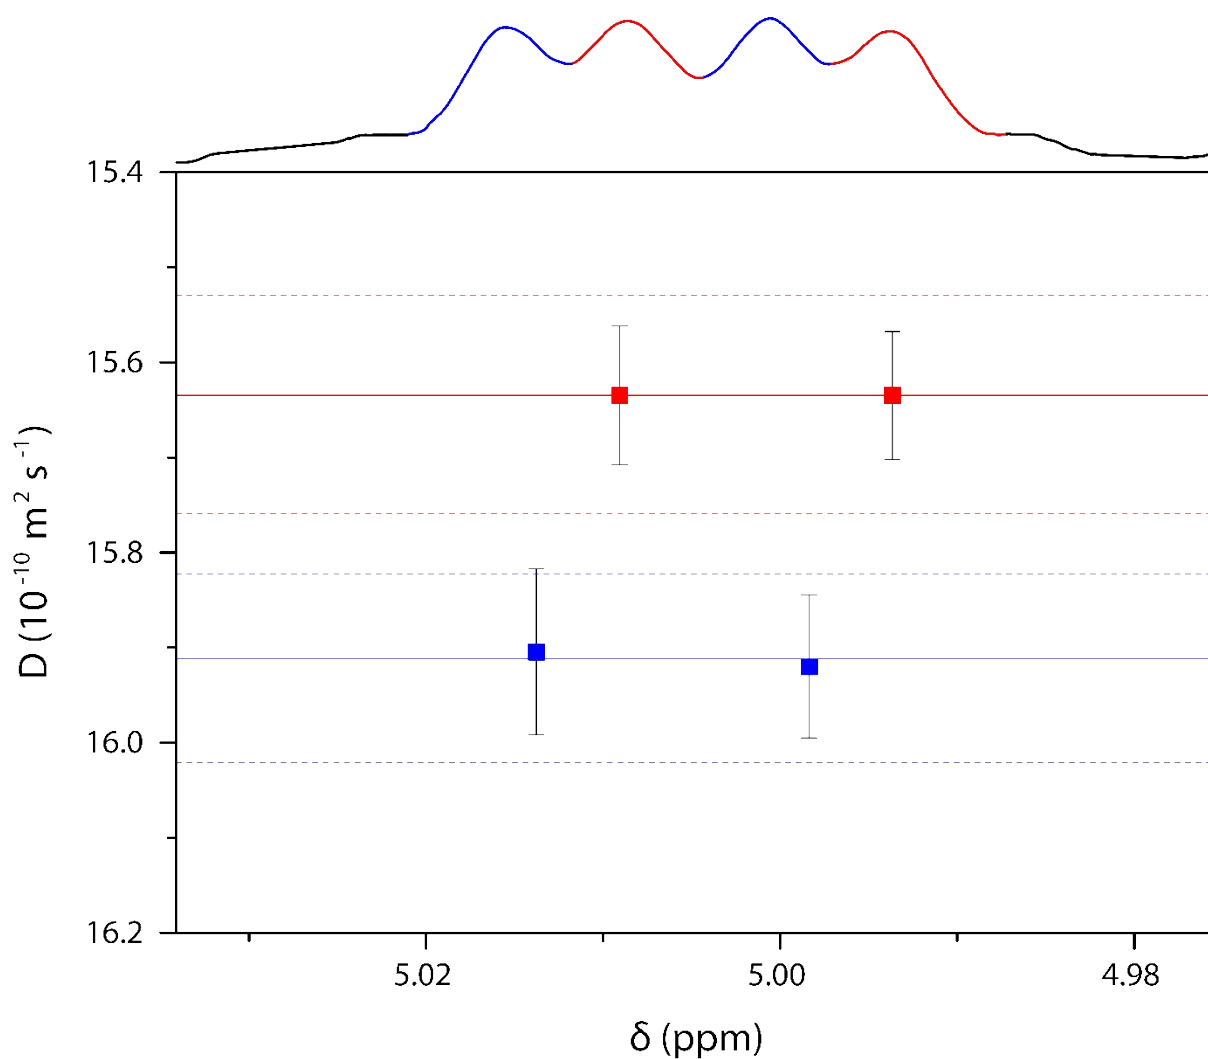

Figure S24: 500 MHz  $^1\text{H}$  MAD projections, with the least attenuated 1D spectrum shown at the top, for compound **18** with matrix **3**

Table S 22: Measured  $^1\text{H}$  diffusion coefficients of compound **18** with matrix **4**

| Chemical Shift | Exp Amplitude | Fit. Amplitude | Error   | Diffusion coefficient <sup>a</sup> | Error <sup>a</sup> |
|----------------|---------------|----------------|---------|------------------------------------|--------------------|
| 4.99012        | 0.85416       | 0.85691        | 0.00080 | 15.63215                           | 0.08469            |
| 4.99527        | 0.56147       | 0.59321        | 0.00056 | 15.91352                           | 0.07513            |
| 5.09654        | 0.86215       | 0.82146        | 0.00038 | 15.64598                           | 0.08417            |
| 5.14235        | 0.62314       | 0.64785        | 0.00090 | 15.94984                           | 0.07411            |

<sup>a</sup>  $\times 10^{-10} \text{ m}^2 \text{ s}^{-1}$ .

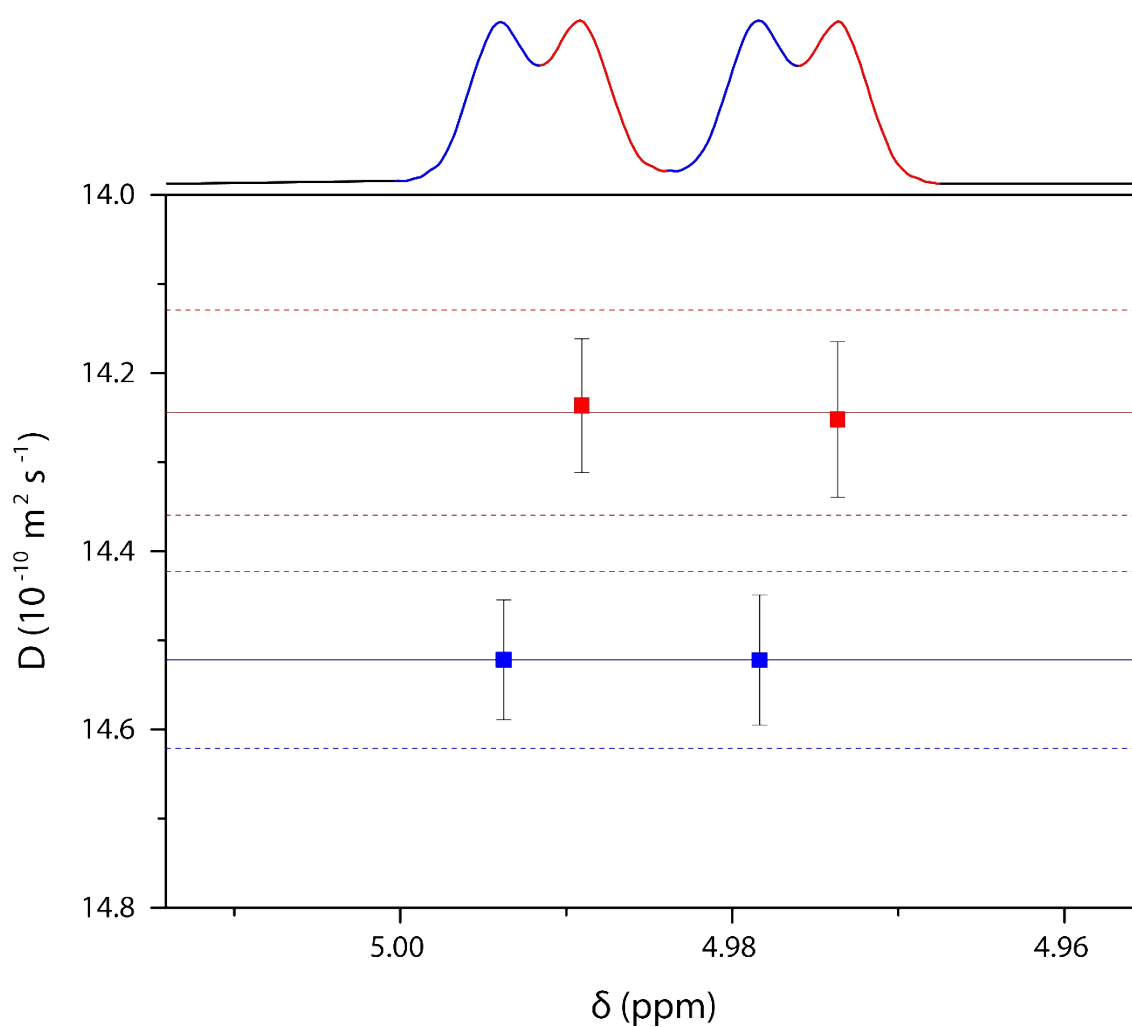

Figure S25: 500 MHz  $^1\text{H}$  MAD projections, with the least attenuated 1D spectrum shown at the top, for compound **18** with matrix **4**

Table S23: Measured  $^1\text{H}$  diffusion coefficients of compound **18** with matrix **4**

| Chemical Shift | Exp Amplitude | Fit. Amplitude | Error   | Diffusion coefficient <sup>a</sup> | Error <sup>a</sup> |
|----------------|---------------|----------------|---------|------------------------------------|--------------------|
| 4.97581        | 0.24624       | 0.25257        | 0.00099 | 14.22176                           | 0.0672             |
| 4.97856        | 0.24452       | 0.24952        | 0.00072 | 14.53654                           | 0.07512            |
| 4.98752        | 0.82929       | 0.84509        | 0.00228 | 14.21197                           | 0.07307            |
| 4.99523        | 0.80300       | 0.81862        | 0.00250 | 14.52152                           | 0.08733            |

<sup>a</sup>  $\times 10^{-10} \text{ m}^2\text{s}^{-1}$ .

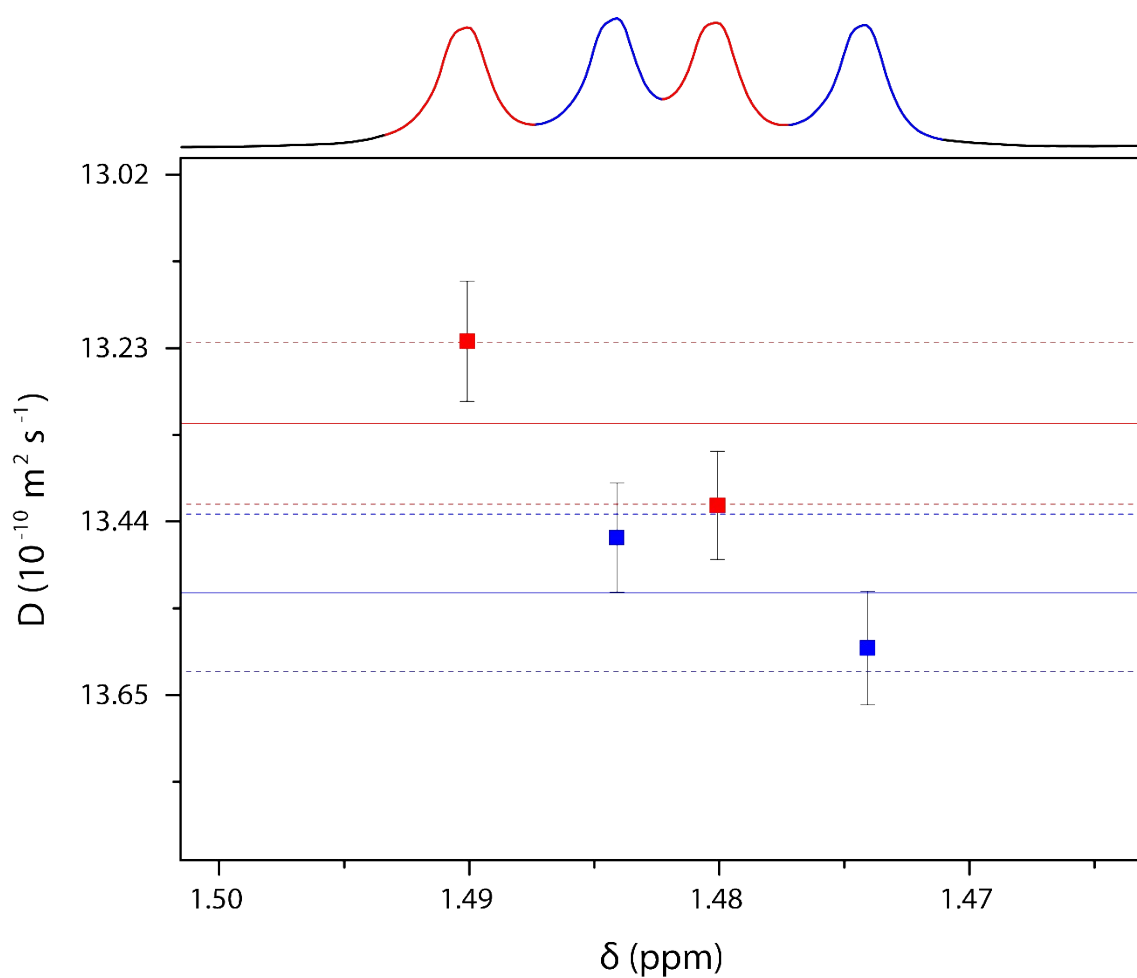

Figure S26: 500 MHz  $^1\text{H}$  MAD projections, with the least attenuated 1D spectrum shown at the top, for compound **19** with matrix **5**

Table S24: Measured  $^1\text{H}$  diffusion coefficients of compound **19** with matrix **5**

| Chemical Shift | Exp Amplitude | Fit. Amplitude | Error   | Diffusion coefficient <sup>a</sup> | Error <sup>a</sup> |
|----------------|---------------|----------------|---------|------------------------------------|--------------------|
| 1.47429        | 23.16102      | 23.57981       | 0.06774 | 13.59298                           | 0.06873            |
| 1.48209        | 22.52145      | 22.92692       | 0.06327 | 13.42034                           | 0.06554            |
| 1.48732        | 22.71900      | 23.13304       | 0.06423 | 13.45929                           | 0.06605            |
| 1.49511        | 22.96126      | 23.32449       | 0.07205 | 13.22179                           | 0.07276            |

<sup>a</sup>  $\times 10^{-10} \text{ m}^2\text{s}^{-1}$ .

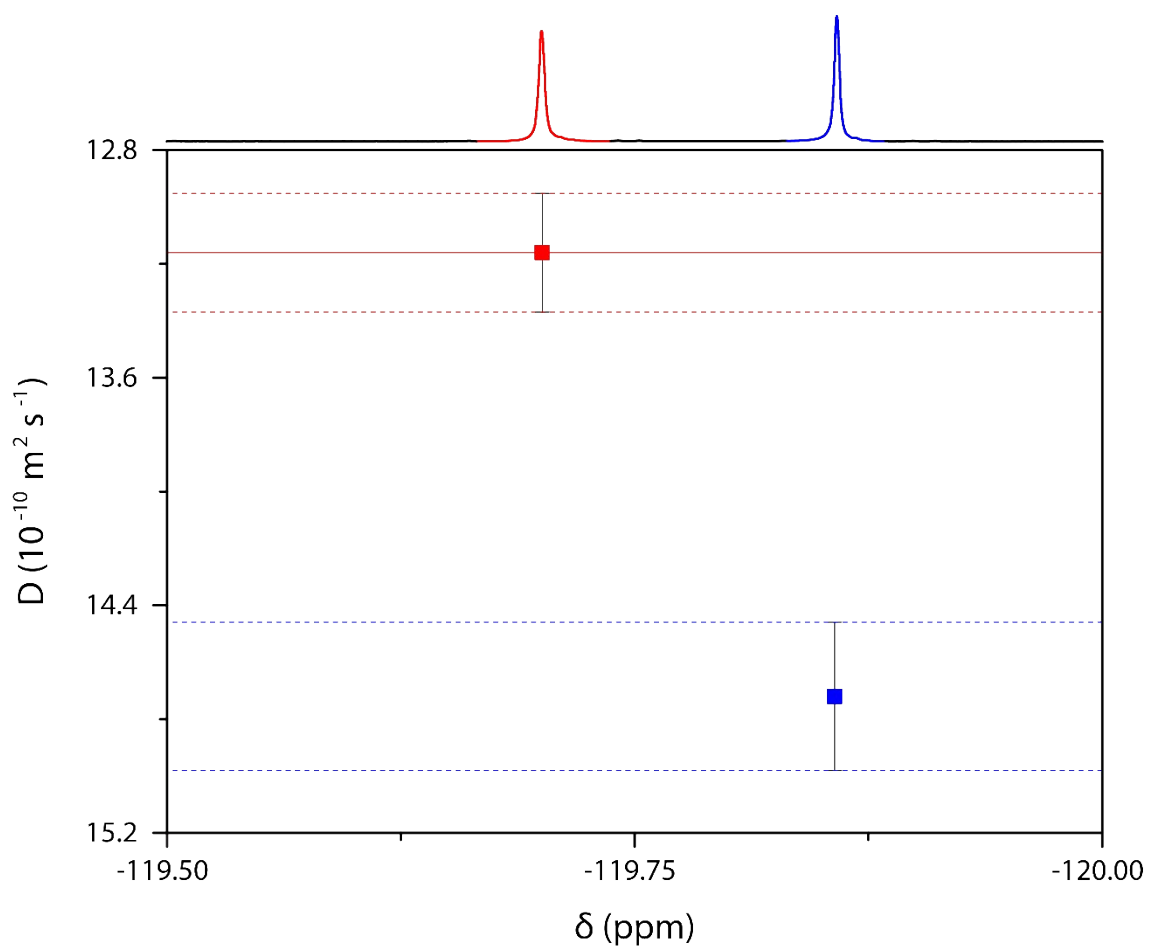

Figure S27: 470 MHz  $^{19}\text{F}$  MAD projections, with the least attenuated 1D spectrum shown at the top, for compound **19** with matrix **5**

Table S 25: Measured  $^{19}\text{F}$  diffusion coefficients of compound **19** with matrix **5**

| Chemical Shift | Exp Amplitude | Fit. Amplitude | Error    | Diffusion coefficient <sup>a</sup> | Error <sup>a</sup> |
|----------------|---------------|----------------|----------|------------------------------------|--------------------|
| -119.85697     | 1069.24432    | 1057.99064     | 10.94702 | 14.72032                           | 0.26089            |
| -119.70061     | 1088.98827    | 1094.16931     | 9.66519  | 13.16042                           | 0.20880            |

<sup>a</sup>  $\times 10^{-10} \text{ m}^2\text{s}^{-1}$ .

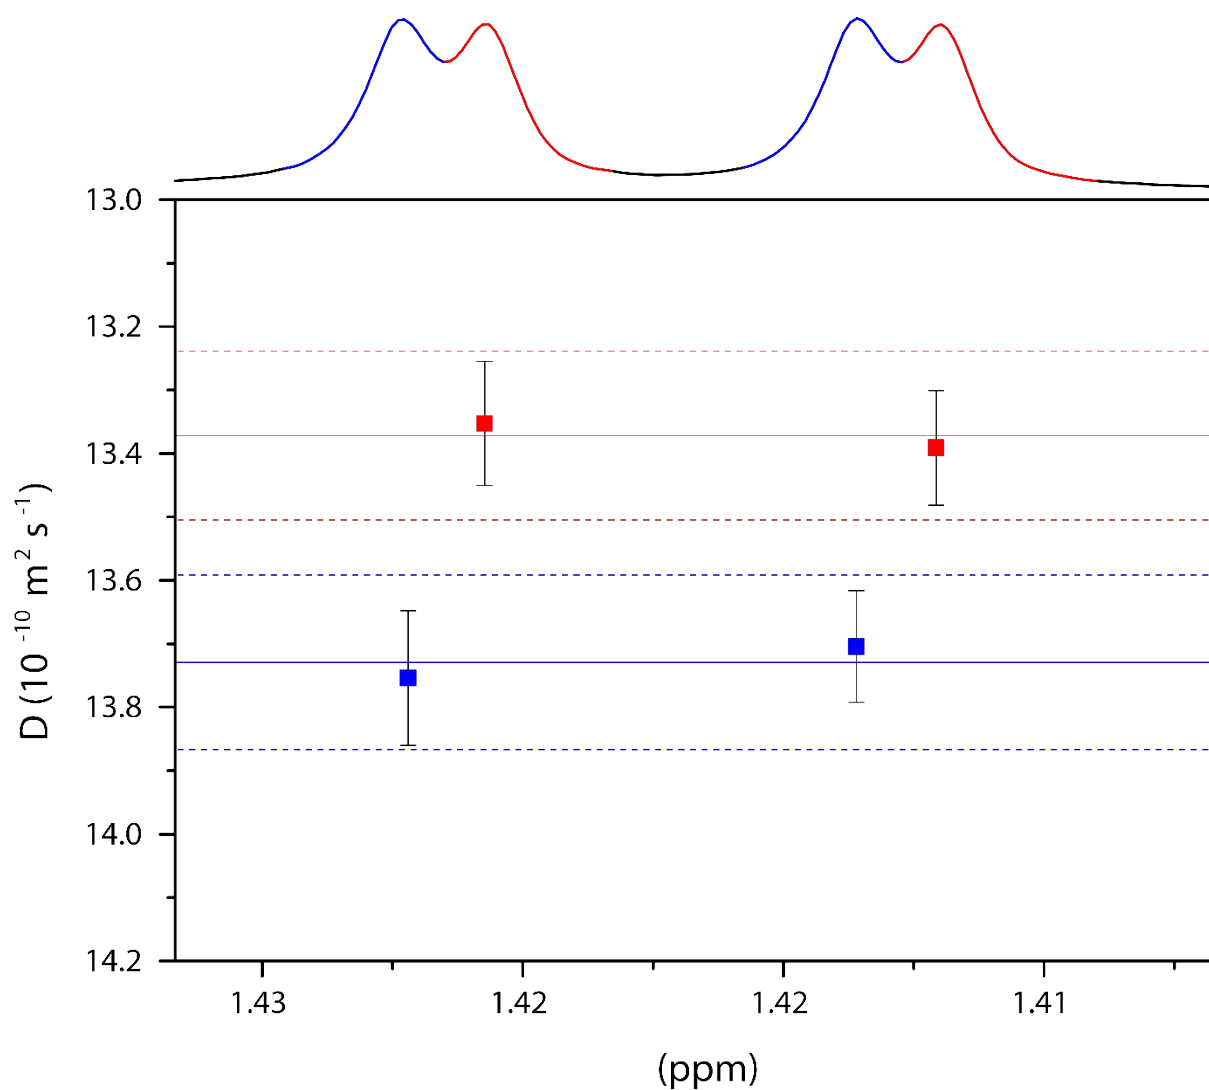

Figure S28: 500 MHz  $^1\text{H}$  MAD projections, with the least attenuated 1D spectrum shown at the top, for compound **20** with matrix **1**

Table S26: Measured  $^1\text{H}$  diffusion coefficients of compound **20** with matrix **1**

| Chemical Shift | Exp Amplitude | Fit. Amplitude | Error   | Diffusion coefficient <sup>a</sup> | Error <sup>a</sup> |
|----------------|---------------|----------------|---------|------------------------------------|--------------------|
| 1.46848        | 2.24693       | 2.29562        | 0.01031 | 13.75392                           | 0.10579            |
| 1.46998        | 1.90696       | 1.94642        | 0.00814 | 13.35288                           | 0.09773            |
| 1.48142        | 2.22216       | 2.25608        | 0.00836 | 13.70422                           | 0.08786            |
| 1.48291        | 1.91028       | 1.93584        | 0.00741 | 13.59103                           | 0.09031            |

<sup>a</sup>  $\times 10^{-10} \text{ m}^2\text{s}^{-1}$ .

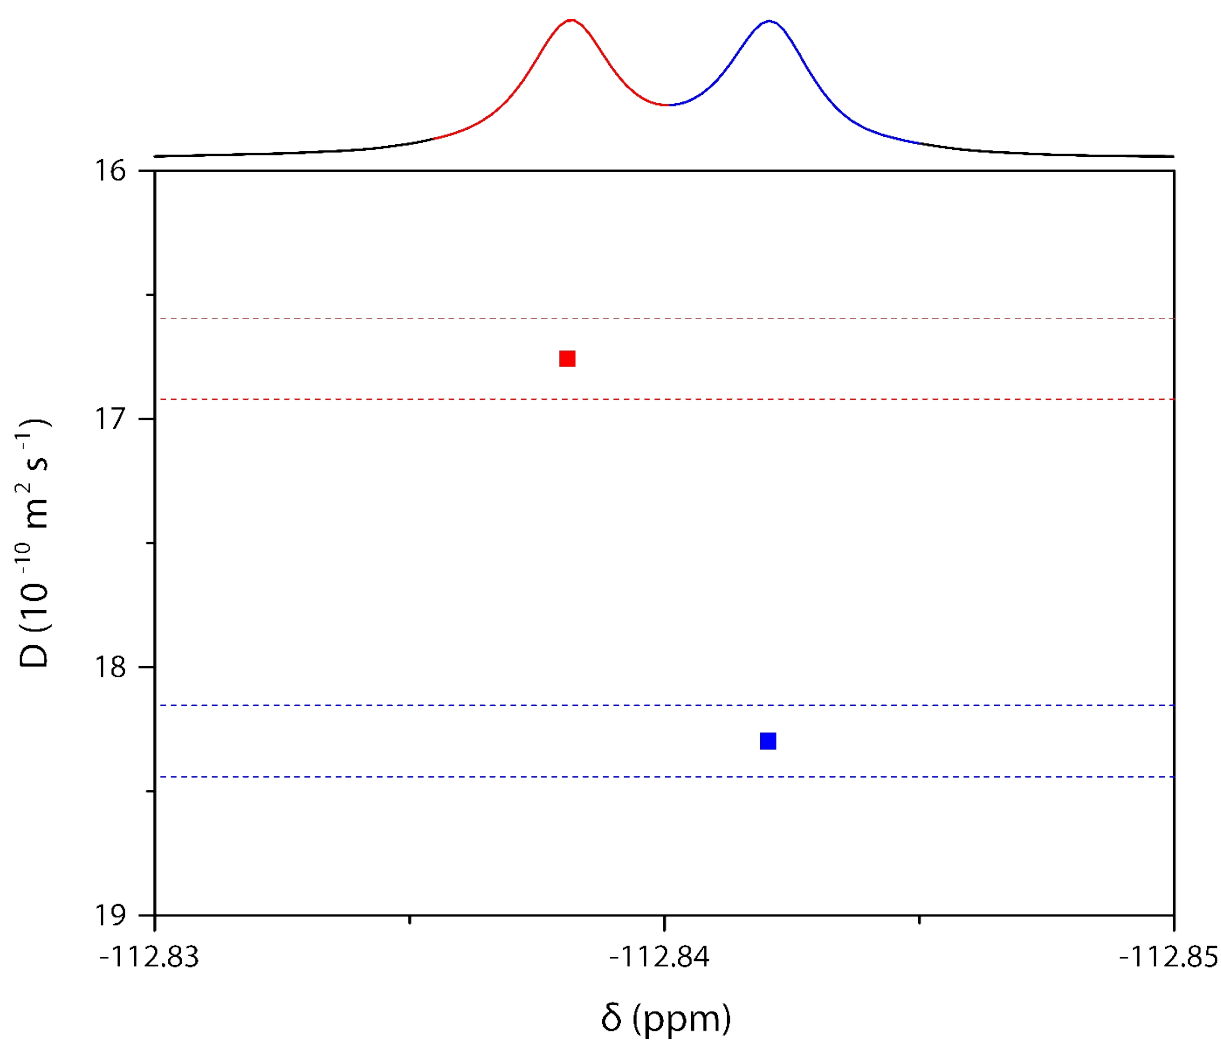

Figure S 29: 470 MHz  $^{19}\text{F}$  MAD projections, with the least attenuated 1D spectrum shown at the top, for compound **20** with matrix **1**

Table S27: Measured  $^{19}\text{F}$  diffusion coefficients of compound **20** with matrix **1**

| Chemical Shift | Exp Amplitude | Fit. Amplitude | Error   | Diffusion coefficient <sup>a</sup> | Error <sup>a</sup> |
|----------------|---------------|----------------|---------|------------------------------------|--------------------|
| -112.84259     | 58.65415      | 51.23681       | 0.30214 | 18.01147                           | 0.19821            |
| -112.83985     | 56.36541      | 54.65418       | 0.56898 | 16.97952                           | 0.24896            |

<sup>a</sup>  $\times 10^{-10} \text{ m}^2\text{s}^{-1}$ .



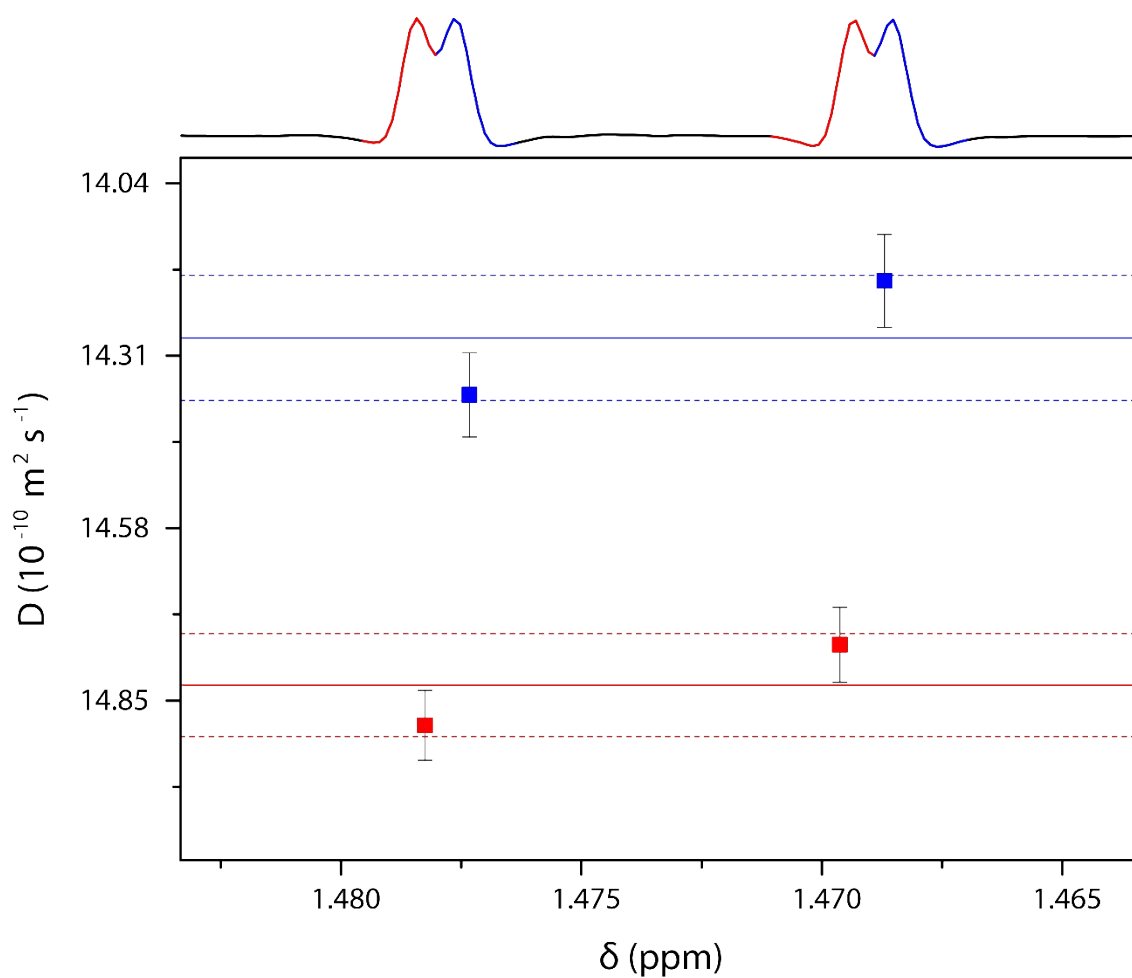

Figure S30: 500 MHz  $^1\text{H}$  MAD projections, with the least attenuated 1D spectrum shown at the top, for compound **20** with matrix **2**

Table S28: Measured  $^1\text{H}$  diffusion coefficients of compound **20** with matrix **2**

| Chemical Shift | Exp Amplitude | Fit. Amplitude | Error   | Diffusion coefficient <sup>a</sup> | Error <sup>a</sup> |
|----------------|---------------|----------------|---------|------------------------------------|--------------------|
| 1.46805        | 1.77473       | 1.81001        | 0.00544 | 14.19300                           | 0.07283            |
| 1.46944        | 1.40784       | 1.42935        | 0.00339 | 14.76259                           | 0.05880            |
| 1.48099        | 1.64515       | 1.67421        | 0.00453 | 14.37115                           | 0.06606            |
| 1.48238        | 1.43106       | 1.45034        | 0.00318 | 14.88882                           | 0.05470            |

<sup>a</sup>  $\times 10^{-10} \text{ m}^2\text{s}^{-1}$ .

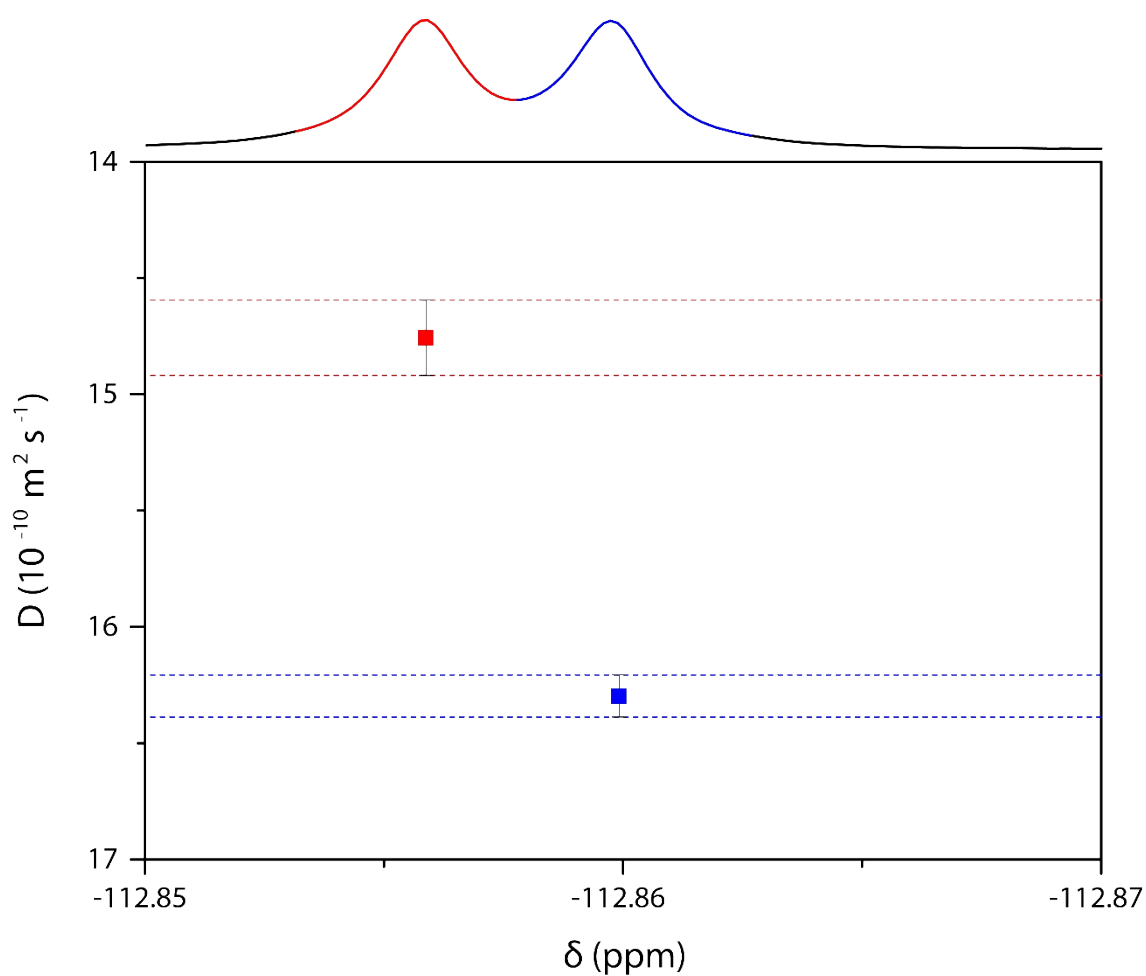

Figure S31: 470 MHz  $^{19}\text{F}$  MAD projections, with the least attenuated 1D spectrum shown at the top, for compound **20** with matrix **2**

Table S29: Measured  $^{19}\text{F}$  diffusion coefficients of compound **20** with matrix **2**

| Chemical Shift | Exp Amplitude | Fit. Amplitude | Error   | Diffusion coefficient <sup>a</sup> | Error <sup>a</sup> |
|----------------|---------------|----------------|---------|------------------------------------|--------------------|
| -112.85992     | 57.22152      | 57.49906       | 0.16705 | 16.29726                           | 0.09054            |
| -112.85588     | 55.73456      | 57.28784       | 0.31248 | 14.75697                           | 0.16252            |

<sup>a</sup>  $\times 10^{-10} \text{ m}^2 \text{ s}^{-1}$ .

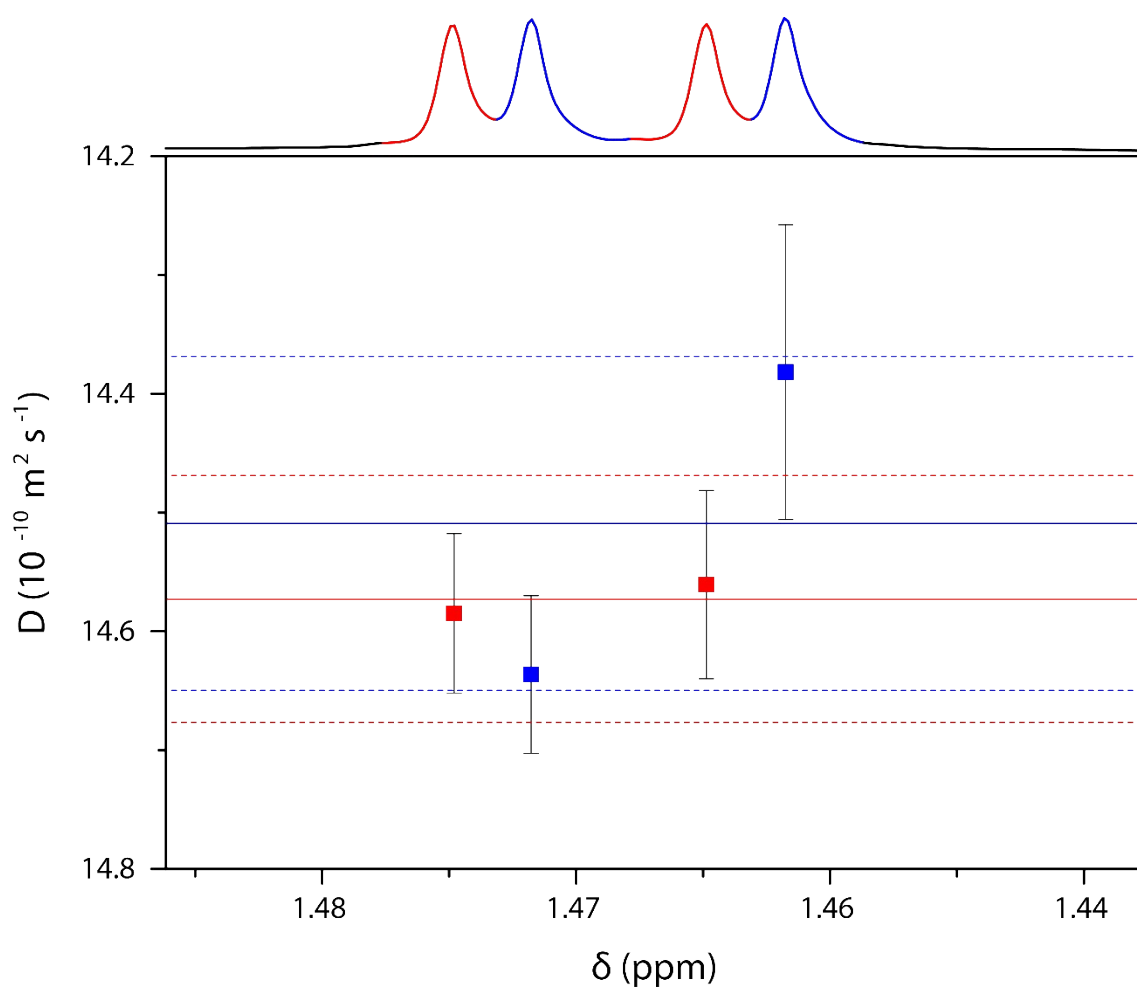

Figure S32: 500 MHz  $^1\text{H}$  MAD projections, with the least attenuated 1D spectrum shown at the top, for compound **20** with matrix **5**

Table S30: Measured  $^1\text{H}$  diffusion coefficients of compound **20** with matrix **5**

| Chemical Shift | Exp Amplitude | Fit. Amplitude | Error   | Diffusion coefficient <sup>a</sup> | Error <sup>a</sup> |
|----------------|---------------|----------------|---------|------------------------------------|--------------------|
| 1.45827        | 40.41234      | 40.97098       | 0.19588 | 14.38181                           | 0.12414            |
| 1.46233        | 38.41639      | 39.16120       | 0.11879 | 14.56064                           | 0.07929            |
| 1.47130        | 40.48803      | 41.22221       | 0.10428 | 14.63634                           | 0.06631            |
| 1.47525        | 38.38826      | 39.32021       | 0.10092 | 14.58485                           | 0.06716            |

<sup>a</sup>  $\times 10^{-10} \text{ m}^2\text{s}^{-1}$ .

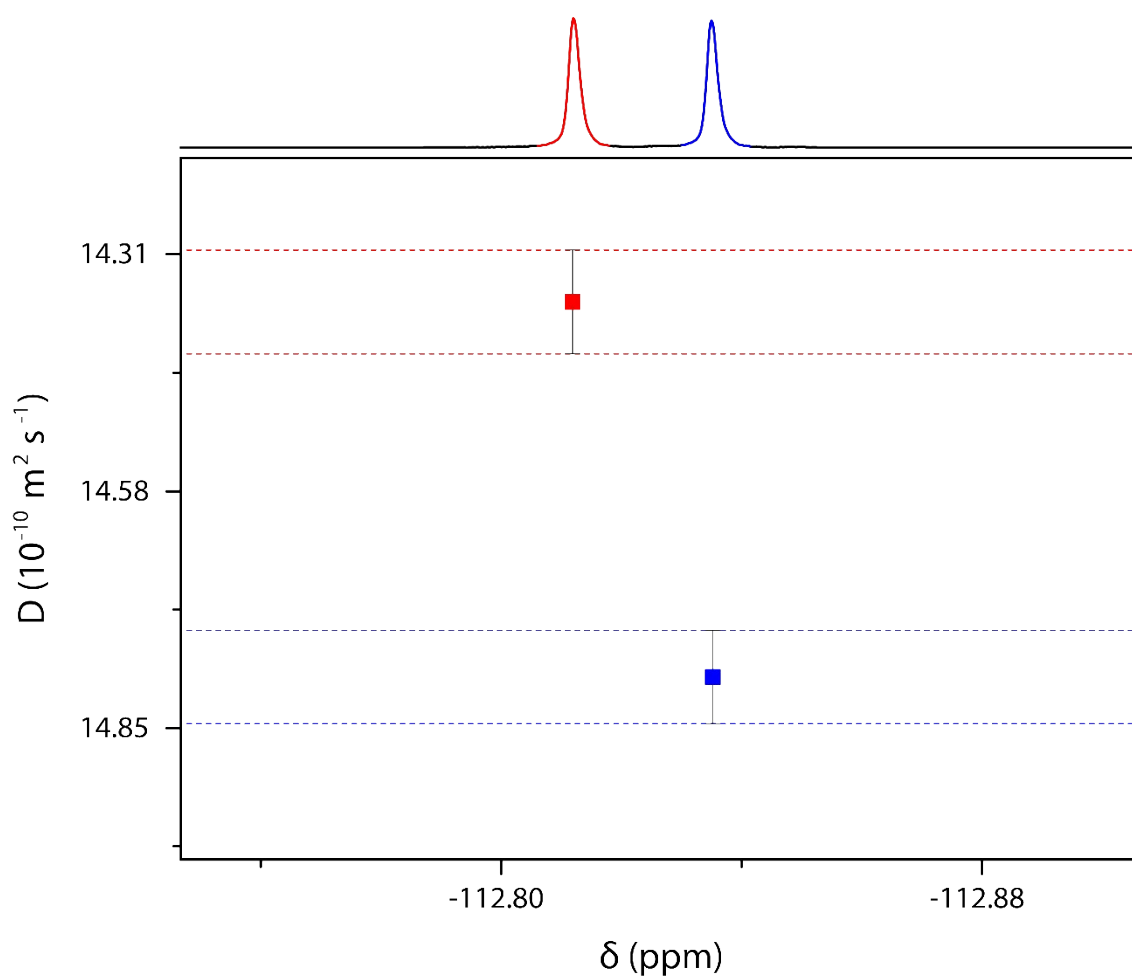

Figure S33: 500 MHz  $^1\text{H}$  MAD projections, with the least attenuated 1D spectrum shown at the top, for compound **20** with matrix **5**

Table S31: Measured  $^1\text{H}$  diffusion coefficients of compound **20** with matrix **5**

| Chemical Shift | Exp Amplitude | Fit. Amplitude | Error   | Diffusion coefficient <sup>a</sup> | Error <sup>a</sup> |
|----------------|---------------|----------------|---------|------------------------------------|--------------------|
| -112.83303     | 189.09478     | 191.04179      | 0.30596 | 14.79189                           | 0.05326            |
| -112.81115     | 218.87327     | 221.62622      | 0.39854 | 14.36425                           | 0.05918            |

<sup>a</sup>  $\times 10^{-10} \text{ m}^2\text{s}^{-1}$ .

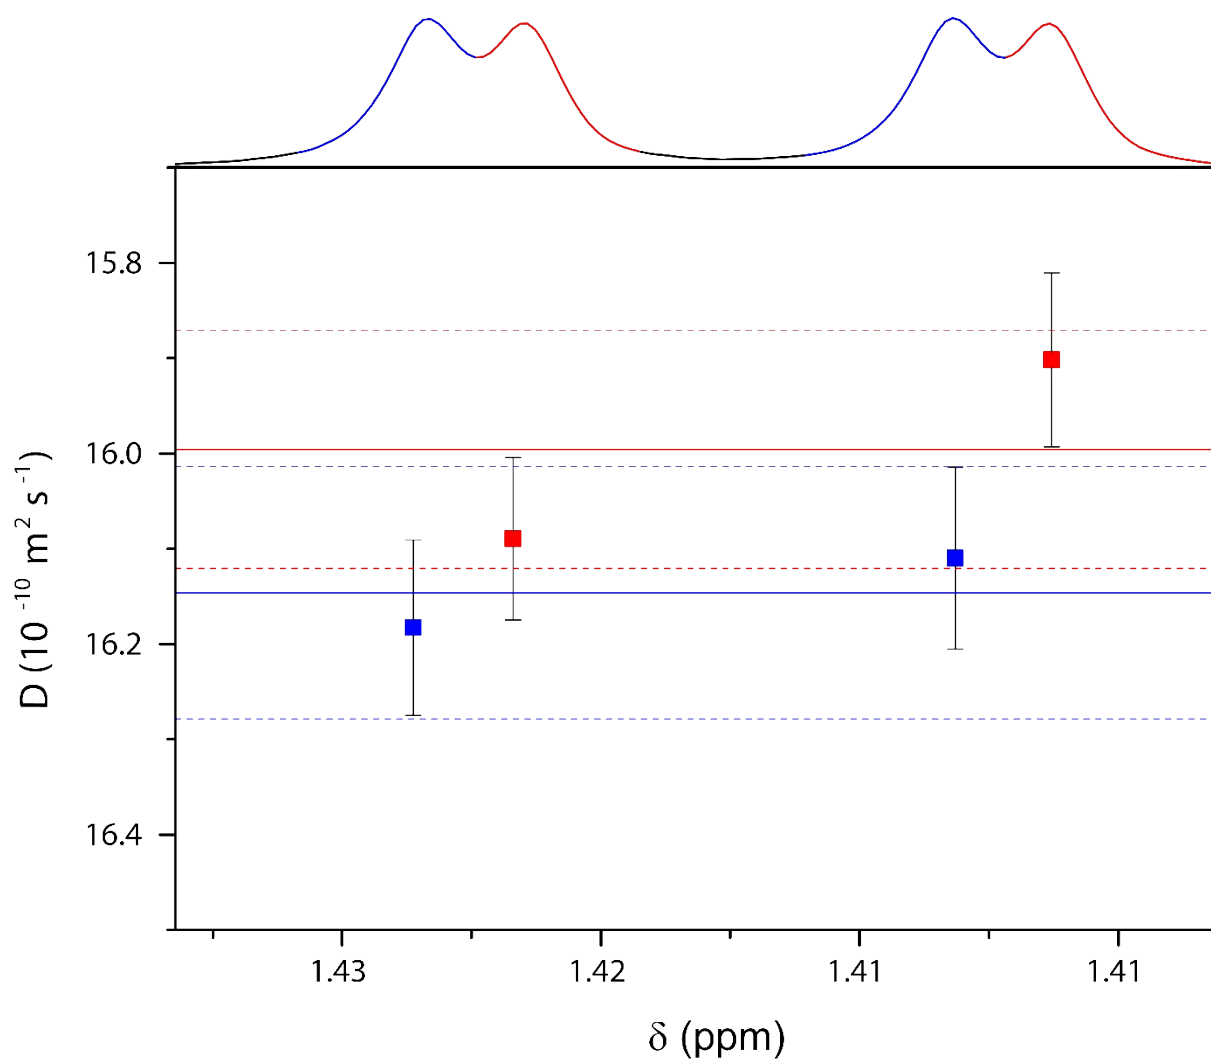

Figure S34: 500 MHz  $^1\text{H}$  MAD projections, with the least attenuated 1D spectrum shown at the top, for compound **21** with matrix **1**

Table S32: Measured  $^1\text{H}$  diffusion coefficients of compound **21** with matrix **1**

| Chemical Shift | Exp Amplitude | Fit. Amplitude | Error   | Diffusion coefficient <sup>a</sup> | Error <sup>a</sup> |
|----------------|---------------|----------------|---------|------------------------------------|--------------------|
| 1.40901        | 1.88287       | 1.92494        | 0.00638 | 16.18304                           | 0.09207            |
| 1.41135        | 2.11322       | 2.15707        | 0.00663 | 16.08970                           | 0.08509            |
| 1.42191        | 1.97652       | 2.02557        | 0.00703 | 16.10982                           | 0.09538            |
| 1.42427        | 2.15047       | 2.20201        | 0.00731 | 15.90186                           | 0.09124            |

<sup>a</sup>  $\times 10^{-10} \text{ m}^2 \text{ s}^{-1}$ .

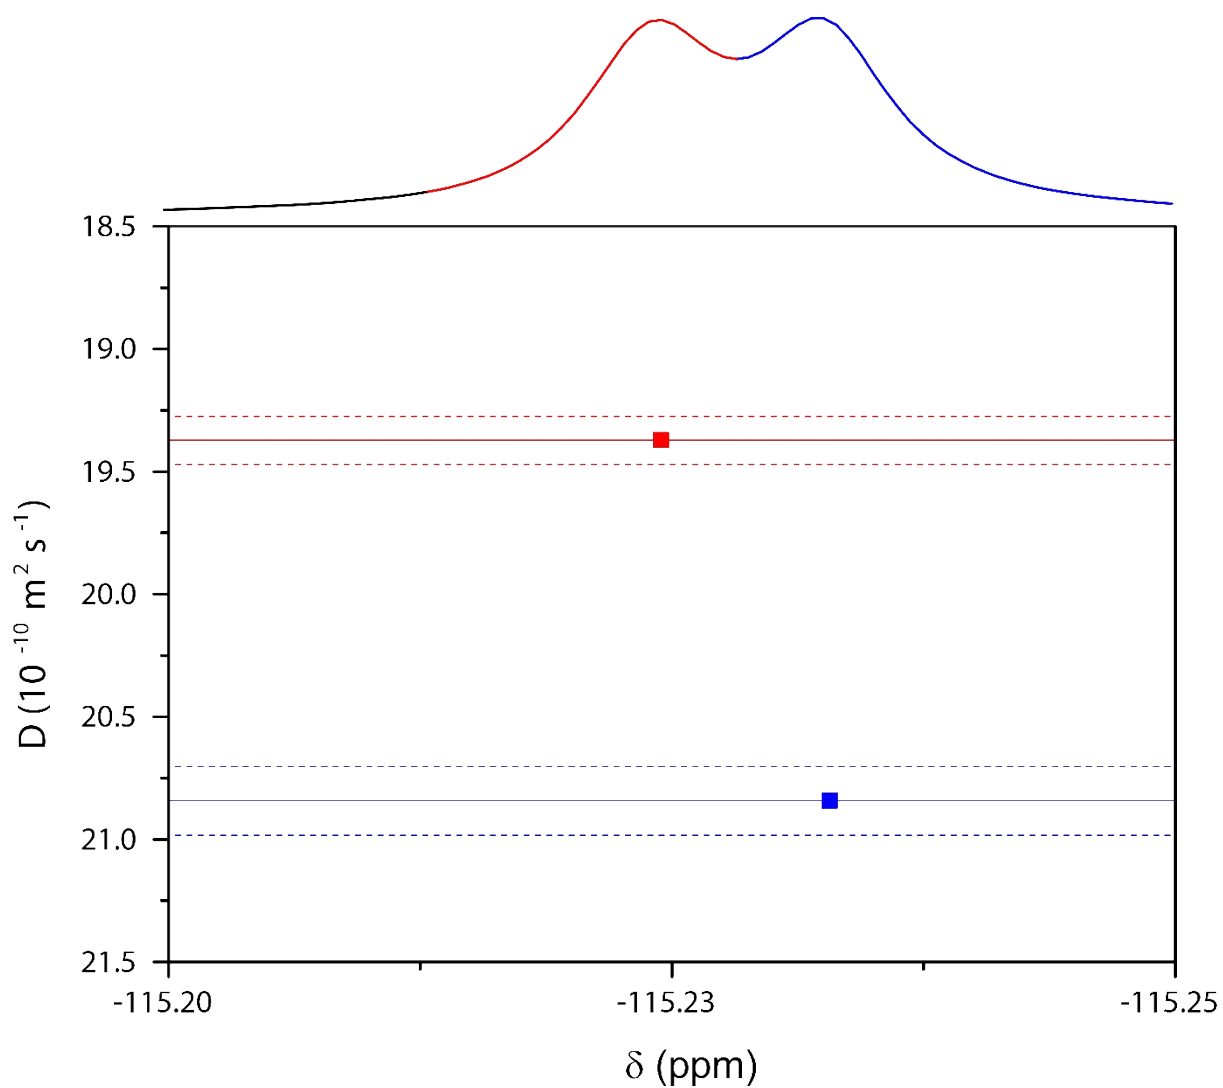

FigureS 35: 470 MHz  $^{19}\text{F}$  MAD projections, with the least attenuated 1D spectrum shown at the top, for compound **21** with matrix **1**

Table S33: Measured  $^{19}\text{F}$  diffusion coefficients of compound **21** with matrix **1**

| Chemical Shift | Exp Amplitude | Fit. Amplitude | Error   | Diffusion coefficient <sup>a</sup> | Error <sup>a</sup> |
|----------------|---------------|----------------|---------|------------------------------------|--------------------|
| -115.23285     | 34.29999      | 35.20581       | 0.14512 | 20.84247                           | 0.14069            |
| -115.22447     | 35.93416      | 36.62742       | 0.10968 | 19.37249                           | 0.09739            |

<sup>a</sup>  $\times 10^{-10} \text{ m}^2\text{s}^{-1}$ .

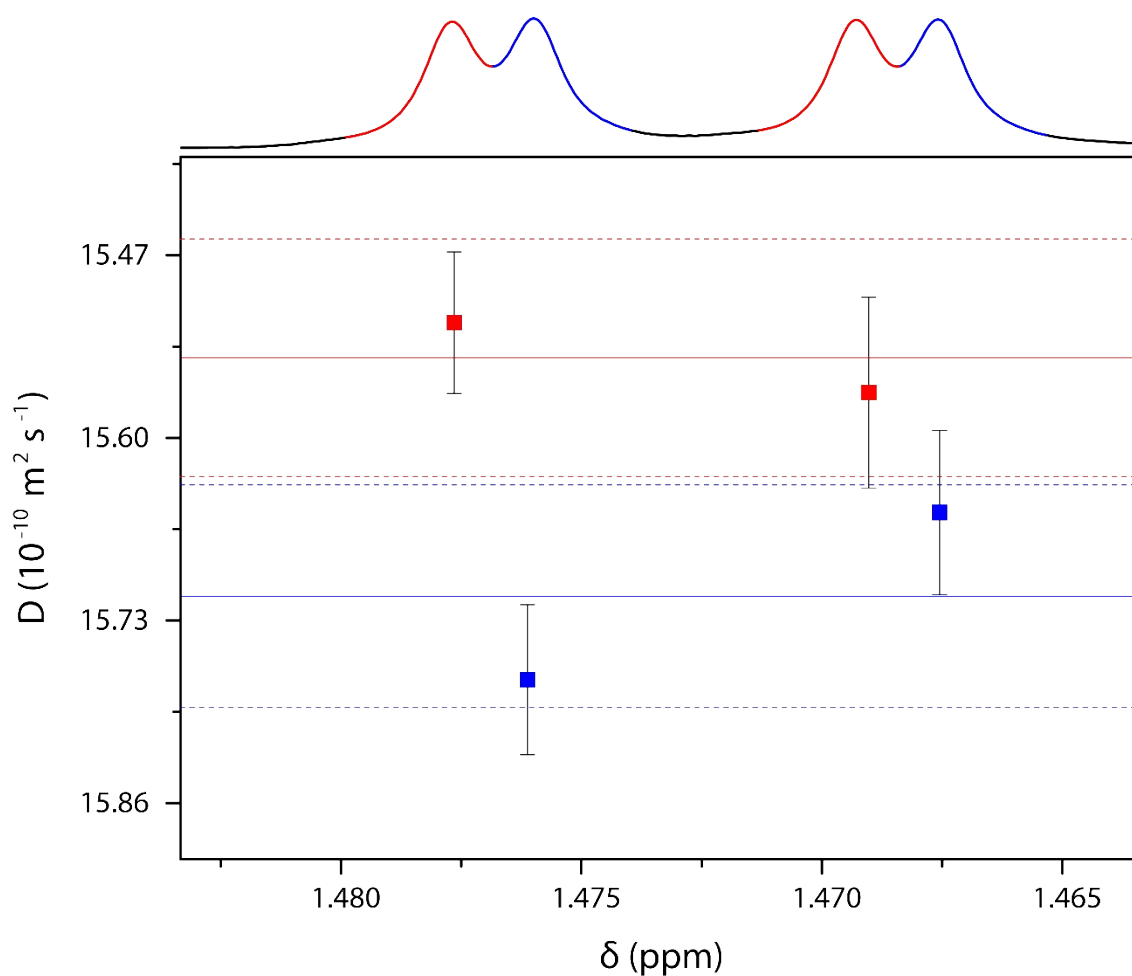

Figure S36: 500 MHz  $^1\text{H}$  MAD projections, with the least attenuated 1D spectrum shown at the top, for compound **21** with matrix **2**

Table S34: Measured  $^1\text{H}$  diffusion coefficients of compound **21** with matrix **2**

| Chemical Shift | Exp Amplitude | Fit. Amplitude | Error   | Diffusion coefficient <sup>a</sup> | Error <sup>a</sup> |
|----------------|---------------|----------------|---------|------------------------------------|--------------------|
| 1.46633        | 3.22707       | 3.26156        | 0.00664 | 15.65318                           | 0.05849            |
| 1.46854        | 3.13290       | 3.18615        | 0.00755 | 15.56786                           | 0.06795            |
| 1.47918        | 3.31760       | 3.35346        | 0.00621 | 15.77217                           | 0.05345            |
| 1.48147        | 2.90653       | 2.94859        | 0.00519 | 15.51803                           | 0.05035            |

<sup>a</sup>  $\times 10^{-10} \text{ m}^2\text{s}^{-1}$ .

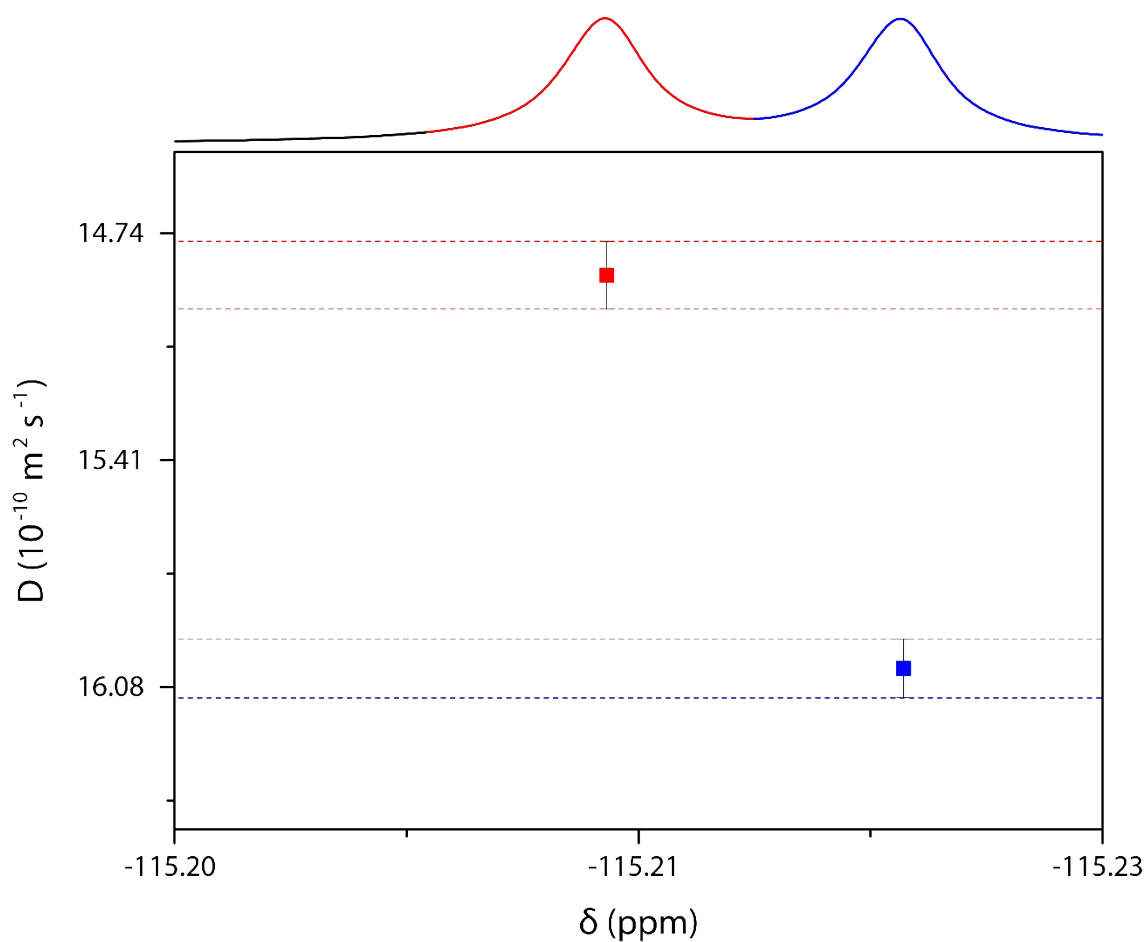

Figure S37: 470 MHz  $^{19}\text{F}$  MAD projections, with the least attenuated 1D spectrum shown at the top, for compound **21** with matrix **2**

Table S35: Measured  $^{19}\text{F}$  diffusion coefficients of compound **21** with matrix **2**

| Chemical Shift | Exp Amplitude | Fit. Amplitude | Error   | Diffusion coefficient <sup>a</sup> | Error <sup>a</sup> |
|----------------|---------------|----------------|---------|------------------------------------|--------------------|
| -115.22357     | 35.59858      | 36.31540       | 0.10180 | 16.02499                           | 0.08667            |
| -115.21397     | 33.48251      | 34.34681       | 0.11432 | 14.86335                           | 0.09948            |

<sup>a</sup>  $\times 10^{-10} \text{ m}^2 \text{ s}^{-1}$ .



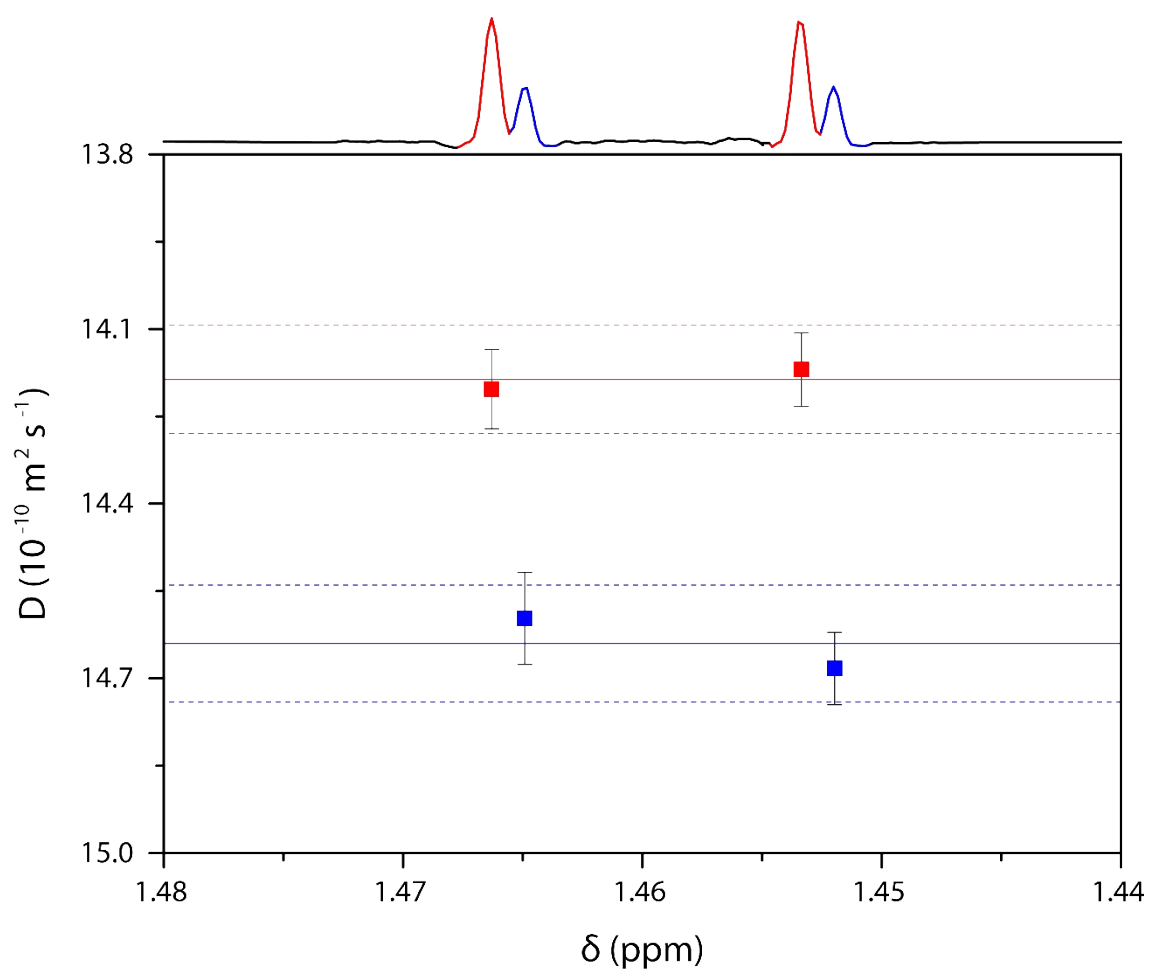

Figure S38: 500 MHz  $^1\text{H}$  MAD projections, with the least attenuated 1D spectrum shown at the top, for compound **21** with matrix **5**

Table S36: Measured  $^1\text{H}$  diffusion coefficients of compound **21** with matrix **5**

| Chemical Shift | Exp Amplitude | Fit. Amplitude | Error   | Diffusion coefficient <sup>a</sup> | Error <sup>a</sup> |
|----------------|---------------|----------------|---------|------------------------------------|--------------------|
| 1.45197        | 1.81497       | 1.84154        | 0.00507 | 14.71635                           | 0.06781            |
| 1.45336        | 3.11113       | 3.16720        | 0.00879 | 14.22127                           | 0.06691            |
| 1.46491        | 1.99712       | 2.02657        | 0.00726 | 14.65934                           | 0.08811            |
| 1.46630        | 3.17046       | 3.22030        | 0.00913 | 14.17420                           | 0.06822            |

<sup>a</sup>  $\times 10^{-10} \text{ m}^2\text{s}^{-1}$ .

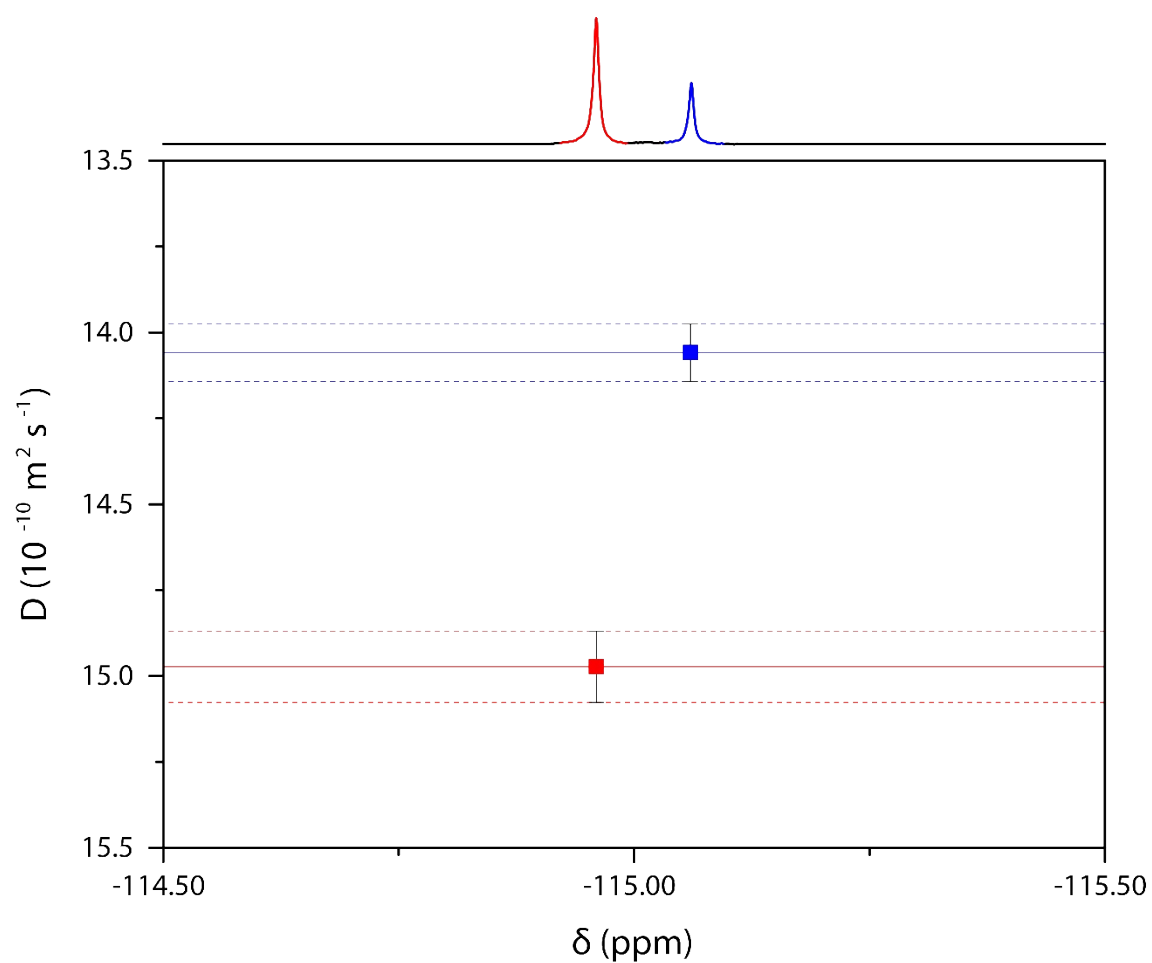

Figure S39: 470 MHz  $^{19}\text{F}$  MAD projections, with the least attenuated 1D spectrum shown at the top, for compound **21** with matrix **5**

Table S37: Measured  $^{19}\text{F}$  diffusion coefficients of compound **21** with matrix **5**

| Chemical Shift | Exp Amplitude | Fit. Amplitude | Error   | Diffusion coefficient <sup>a</sup> | Error <sup>a</sup> |
|----------------|---------------|----------------|---------|------------------------------------|--------------------|
| -115.05398     | 64.67351      | 66.32904       | 0.26369 | 14.97297                           | 0.10378            |
| -114.95899     | 155.33808     | 158.92908      | 0.53061 | 14.05888                           | 0.08411            |

<sup>a</sup>  $\times 10^{-10} \text{ m}^2 \text{ s}^{-1}$ .

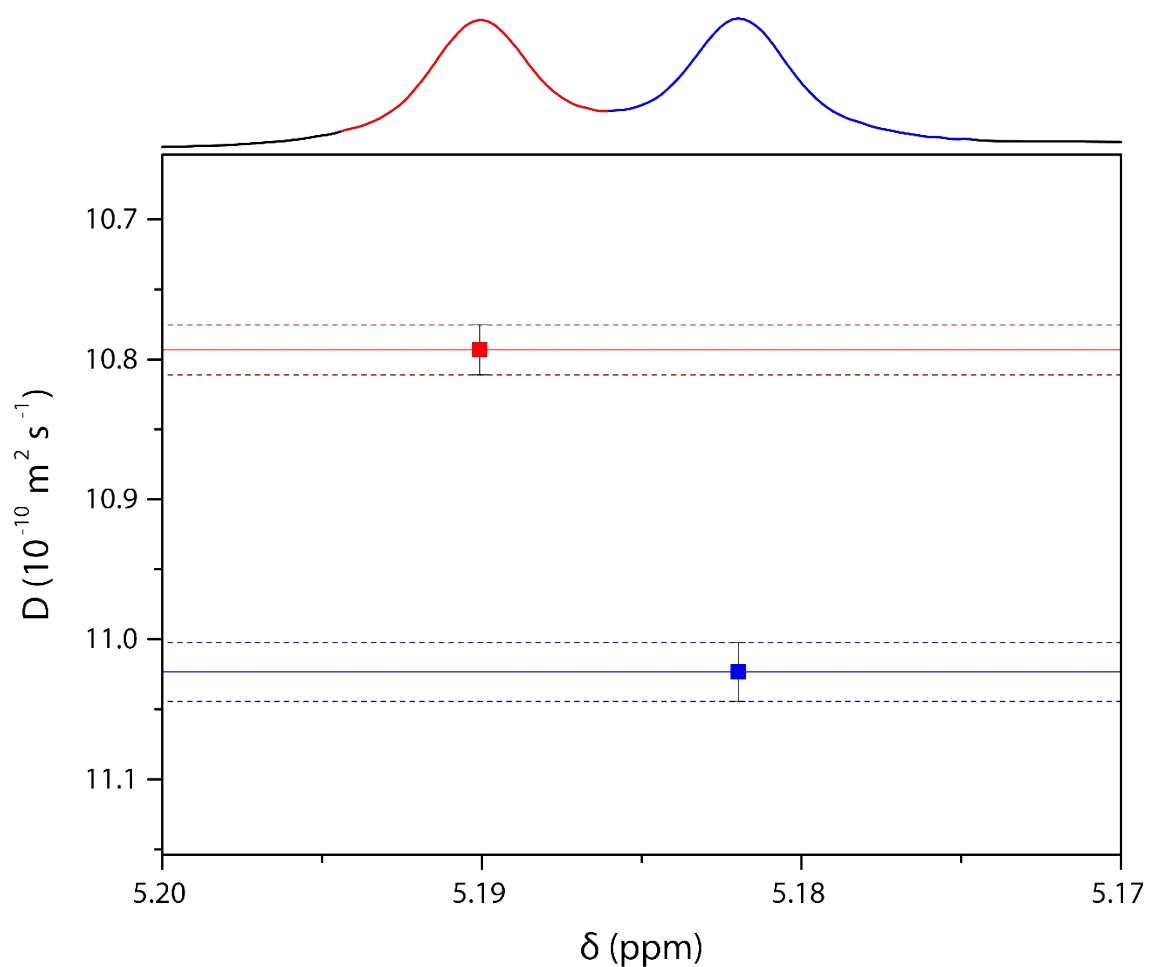

Figure S40: 500 MHz  $^1\text{H}$  MAD projections, with the least attenuated 1D spectrum shown at the top, for compound **22** with matrix **1**

Table S38: Measured  $^1\text{H}$  diffusion coefficients of compound **22** with matrix **1**

| Chemical Shift | Exp Amplitude | Fit. Amplitude | Error   | Diffusion coefficient <sup>a</sup> | Error <sup>a</sup> |
|----------------|---------------|----------------|---------|------------------------------------|--------------------|
| 5.18197        | 3.46637       | 3.46083        | 0.00459 | 11.08037                           | 0.02732            |
| 5.19007        | 3.38298       | 3.38872        | 0.00387 | 10.78122                           | 0.02320            |

<sup>a</sup>  $\times 10^{-10} \text{ m}^2\text{s}^{-1}$ .

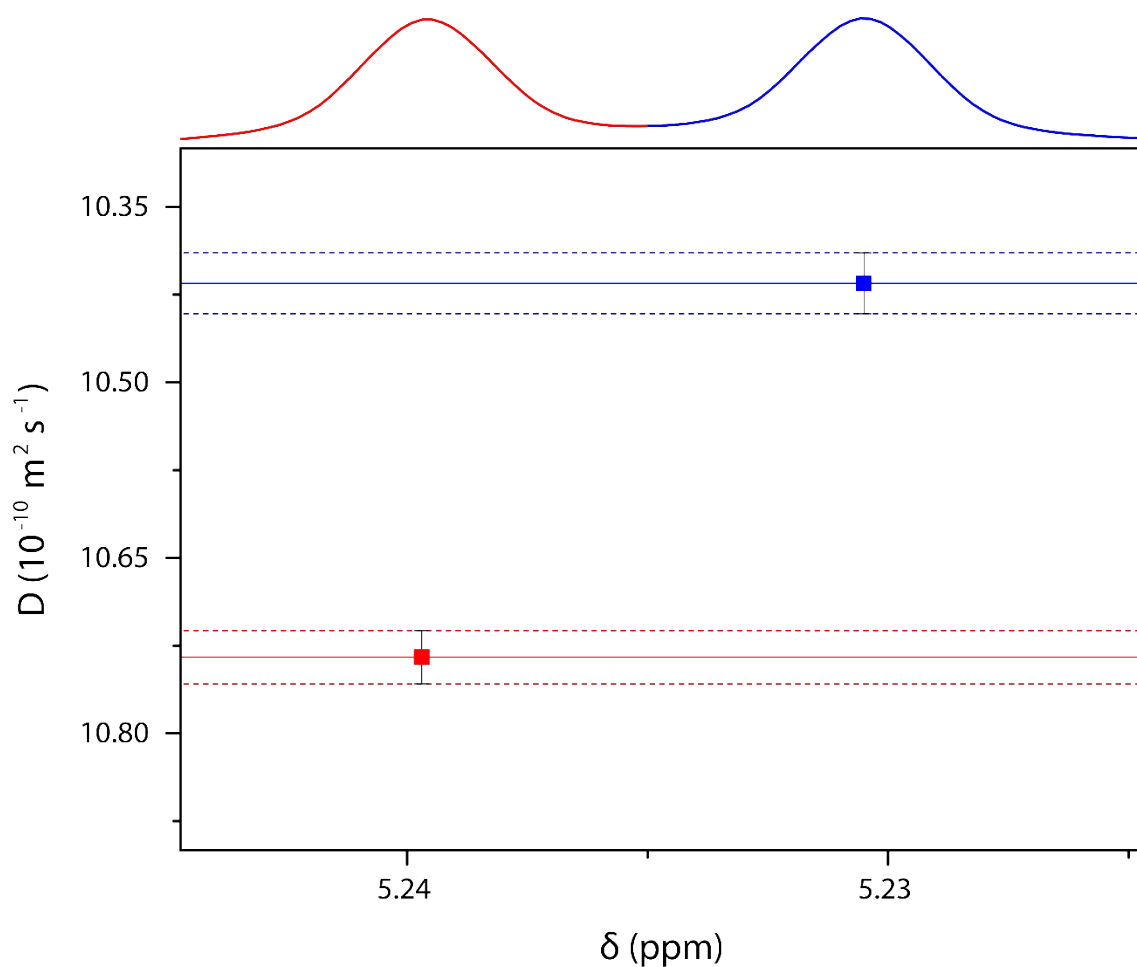

Figure S41: 500 MHz  $^1\text{H}$  MAD projections, with the least attenuated 1D spectrum shown at the top, for **22** with matrix **2**

Table S39: Measured  $^1\text{H}$  diffusion coefficients of compound **22** with matrix **2**

| Chemical Shift | Exp Amplitude | Fit. Amplitude | Error   | Diffusion coefficient <sup>a</sup> | Error <sup>a</sup> |
|----------------|---------------|----------------|---------|------------------------------------|--------------------|
| 5.22792        | 2.95133       | 2.96586        | 0.00437 | 10.41542                           | 0.02602            |
| 5.23574        | 2.86011       | 2.87325        | 0.00375 | 10.73493                           | 0.02281            |

<sup>a</sup>  $\times 10^{-10} \text{ m}^2\text{s}^{-1}$ .

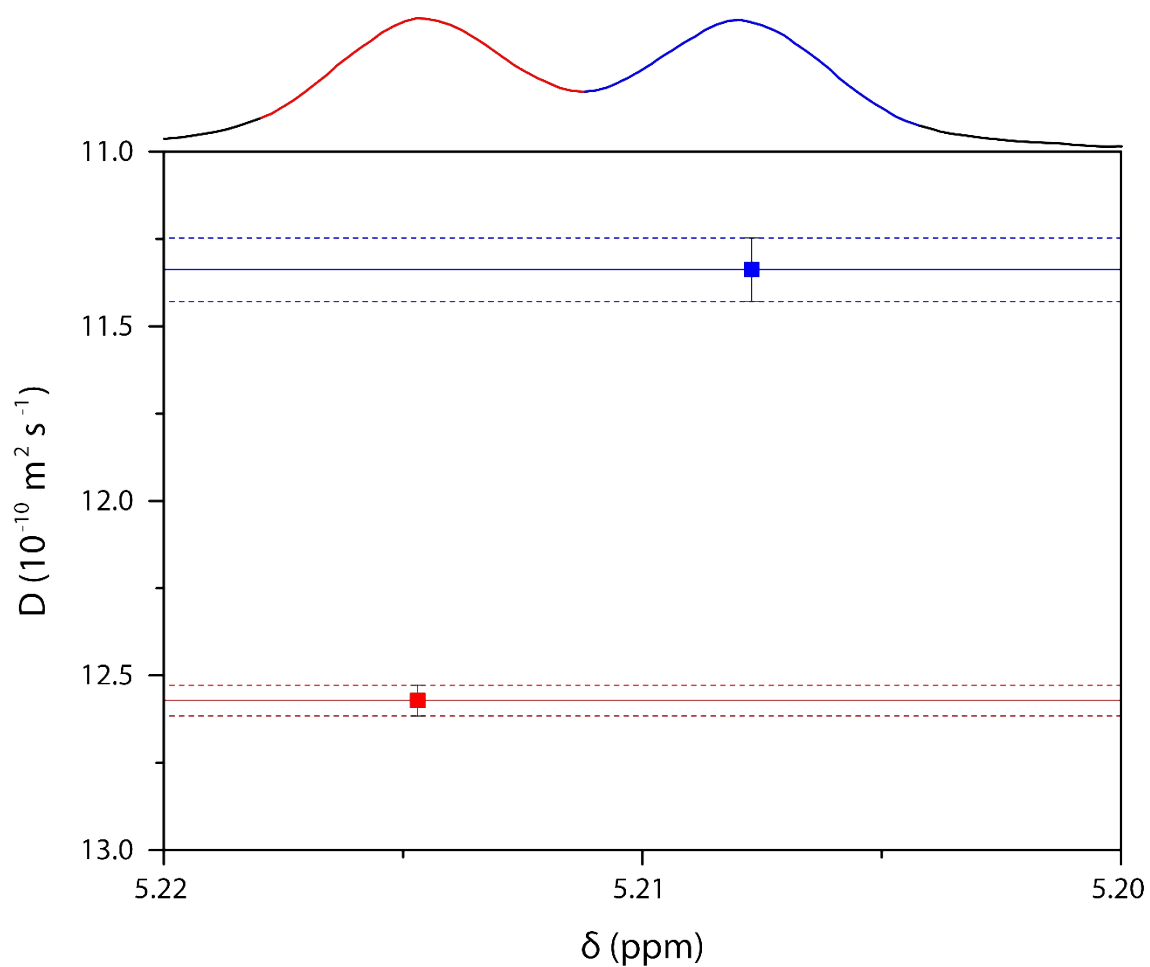

Figure S42: 500 MHz  $^1\text{H}$  MAD projections, with the least attenuated 1D spectrum shown at the top, for compound **22** with matrix **3**

Table S40: Measured  $^1\text{H}$  diffusion coefficients of compound **22** with matrix **3**

| Chemical Shift | Exp Amplitude | Fit. Amplitude | Error   | Diffusion coefficient <sup>a</sup> | Error <sup>a</sup> |
|----------------|---------------|----------------|---------|------------------------------------|--------------------|
| 5.20879        | 3.03221       | 3.12006        | 0.01300 | 11.33795                           | 0.09072            |
| 5.21482        | 2.96480       | 3.01126        | 0.00579 | 12.57174                           | 0.04410            |

<sup>a</sup>  $\times 10^{-10} \text{ m}^2\text{s}^{-1}$ .

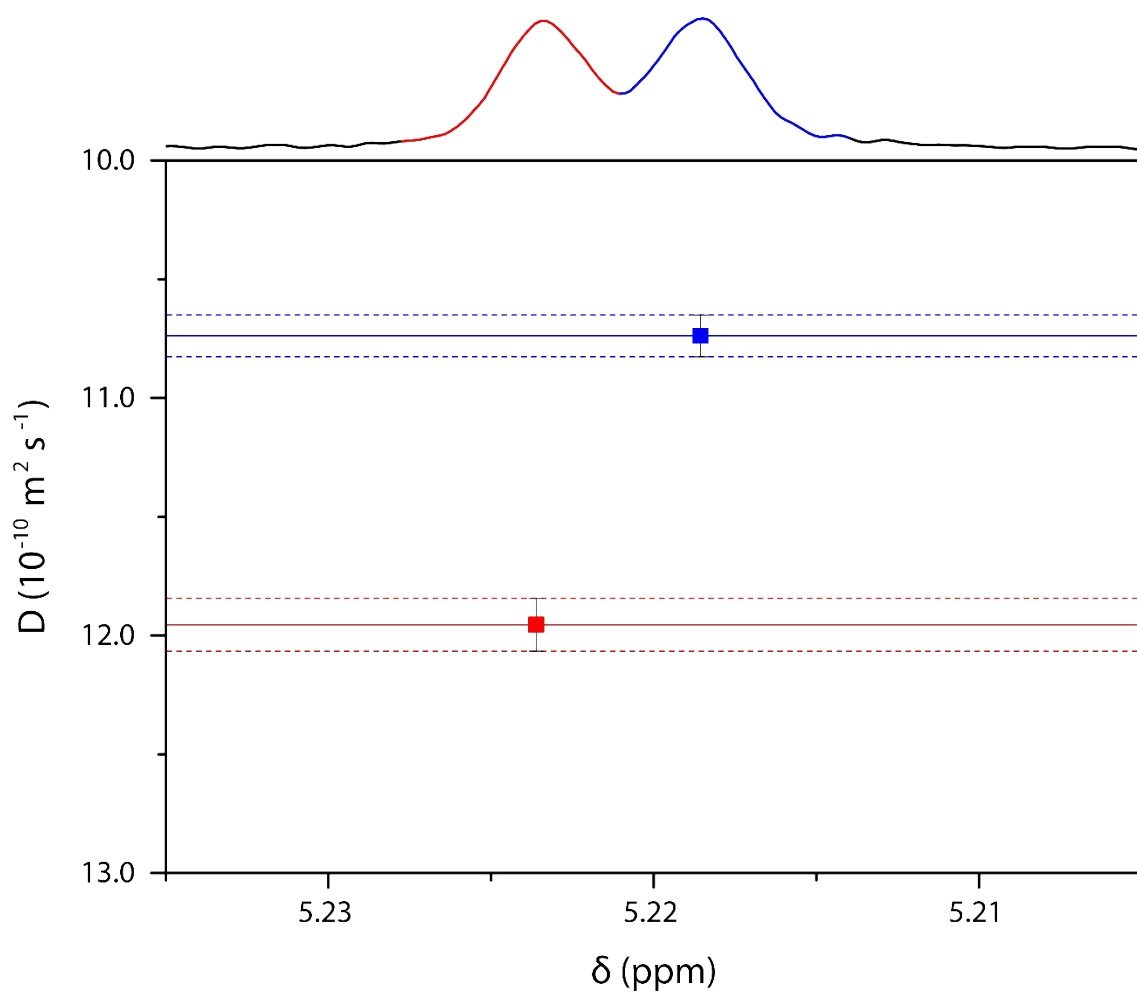

Figure S43: 500 MHz  $^1\text{H}$  MAD projections, with the least attenuated 1D spectrum shown at the top, for compound **22** with matrix **4**

Table S41: Measured  $^1\text{H}$  diffusion coefficients of compound **22** with matrix **4**

| Chemical Shift | Exp Amplitude | Fit. Amplitude | Error   | Diffusion coefficient <sup>a</sup> | Error <sup>a</sup> |
|----------------|---------------|----------------|---------|------------------------------------|--------------------|
| 5.21856        | 5.82146       | 5.93012        | 0.02728 | 10.73906                           | 0.08795            |
| 5.22361        | 5.90230       | 6.05418        | 0.03315 | 11.95481                           | 0.11146            |

<sup>a</sup>  $\times 10^{-10} \text{ m}^2\text{s}^{-1}$ .

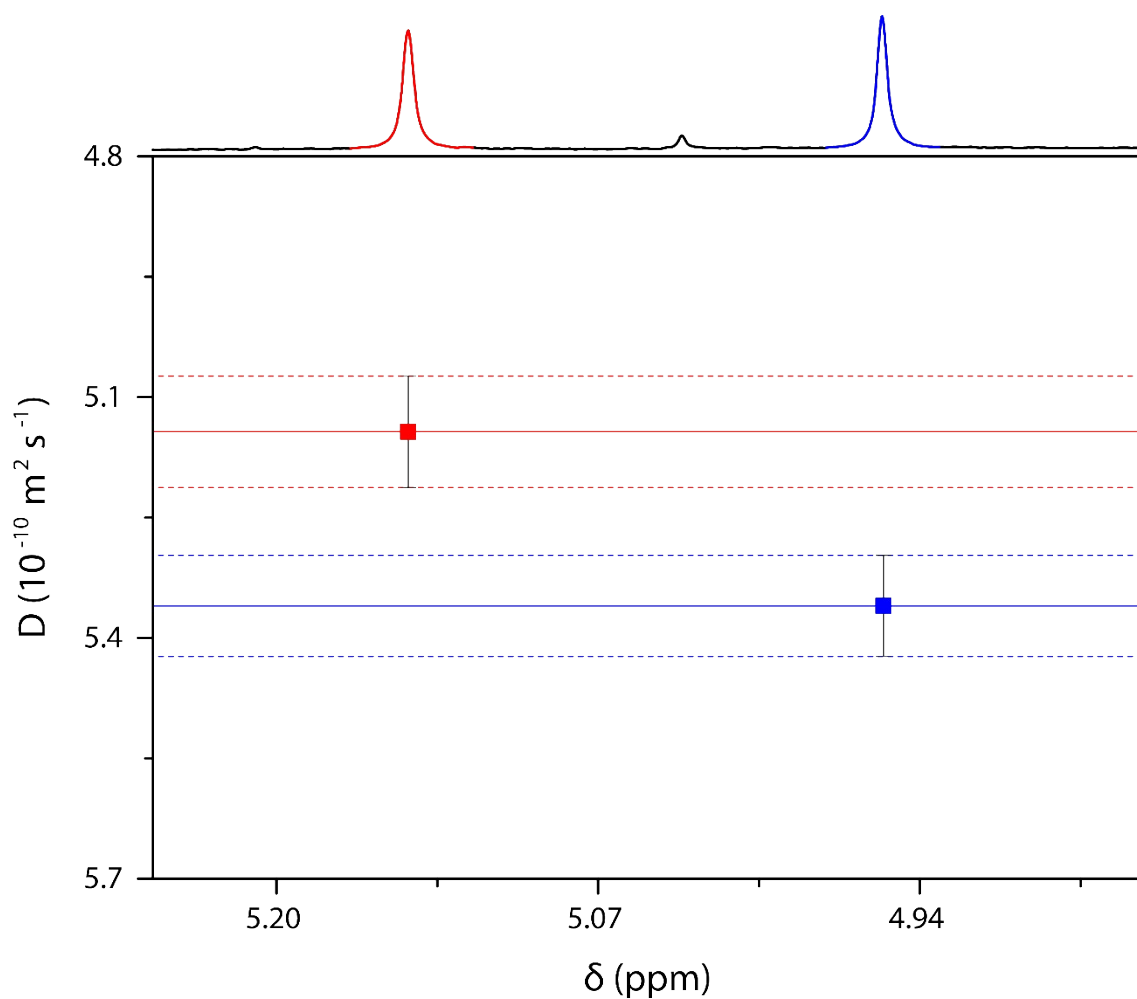

Figure S44: 500 MHz  $^1\text{H}$  MAD projections, with the least attenuated 1D spectrum shown at the top, for compound **22** with matrix **5**

Table S42: Measured  $^1\text{H}$  diffusion coefficients of compound **22** with matrix **5**

| Chemical Shift | Exp Amplitude | Fit. Amplitude | Error   | Diffusion coefficient <sup>a</sup> | Error <sup>a</sup> |
|----------------|---------------|----------------|---------|------------------------------------|--------------------|
| 4.95465        | 4.26278       | 4.42193        | 0.02680 | 5.36005                            | 0.06298            |
| 5.14675        | 4.10159       | 4.22652        | 0.02880 | 5.14321                            | 0.06949            |

<sup>a</sup>  $\times 10^{-10} \text{ m}^2\text{s}^{-1}$ .

## References

- 1 L. Castañar, G. D. Poggetto, A. A. Colbourne, G. A. Morris, and M. Nilsson, *Magnetic Resonance in Chemistry*, 2018, **56**, 546.
- 2 G. A. Morris, *Journal of Magnetic Resonance*, 1988, **80**, 547.
